# Supplementary material for: Genome-Wide Association Study Identifies a Susceptibility Locus for Comitant Esotropia and Suggests a Parent-of-Origin Effect
Source: PubMed Central journal article supplement — Invest Ophthalmol Vis Sci. 2018 Aug;59(10):4054–64. doi: 10.1167/iovs.18-24082 (PMC6088800; doi:10.1167/iovs.18-24082), 2018-08
Supplement: iovs-59-08-37_s01.pdf [file iovs-59-08-37_s01.pdf]

## **SUPPLEMENTARY DATA**

### **TABLE OF CONTENTS**

#### **A. SUPPLEMENTARY METHODS:**

Definitions of esotropia subtypes

Control cohorts

Genotyping

Quality Control Procedures

Imputation

#### **B. SUPPLEMENTARY FIGURES AND LEGENDS:**

Figure S1: Principal components analysis from all SNPs in the GWAS data set.

Figure S2: Quantile-quantile (Q-Q) plots of the non-accommodative and accommodative discovery cohorts.

Figure S3: Cluster plots for SNPs rs2244352 and rs912759.

Figure S4: Meta-analysis results of the accommodative esotropia cohort.

#### **C. SUPPLEMENTARY TABLES:**

Table S1: Numbers and origin of cases for discovery and replication and control cohorts.

Table S2: Analysis results for top SNPs in the non-accommodative esotropia discovery cohort and the matching replication results.

Table S3: Analysis results for top SNPs in the accommodative esotropia discovery and replication cohorts and their meta-analysis.

Table S4: Meta-analysis results at rs2244352 and rs912759 in the non-accommodative and accommodative ET cohorts.

Table S5: Analysis results for the top SNPs in the amblyopia and hyperopia subgroups discovery and replication cohorts and their meta-analysis.

Table S6: SNPs in high linkage disequilibrium (LD) with rs2244352.

Table S7: Single Tissue eQTL analysis for rs2244352.

Table S8: Effect sizes for Single Tissue eQTL analysis of rs2244352 in different brain subregions.

Table S9: Expression and function of the genes within the topologically associating domain (TAD) which includes rs2244352.

## **A. SUPPLEMENTARY METHODS**

### **Definitions of esotropia subtypes:**

- Esotropia: Manifest esotropia in primary position.
- Infantile Esotropia: Manifest esotropia that develops within the first six months of life.
- Intermittent Esotropia: Patient has an intermittent esotropia at any point during the examination in primary position.
- Esophoria: Esophoria of 10 prism diopters or more in primary position.
- Acquired Esotropia: Acute acquired non-accommodative esotropia.
- Accommodative Esotropia: Manifest esotropia that reduces with hyperopic correction to a range that fusion may be achieved (less than 10 prism diopters) or reliably demonstrate fusion. If bifocals are required to reduce the deviation to 10 prism diopters or less it is acceptable.
- Partially accommodative ETs were manifest esotropias who also had an accommodative component to their deviation. An accommodative component was an eso-deviation that reduced with hyperopic correction or +3.00 lenses by 10 prism diopters or more.

### **Control cohorts:**

Control genotypes generated on Illumina SNP microarrays were derived from the database of Genotypes and Phenotypes (dbGaP) as follows:

- 1877 controls from NEI Age-Related Eye Disease Study (AREDS) Genetic Variation in Refractive Error Substudy (phs000429.v1.p1). Samples were genotyped using Omni 2.5 version: 4v\_1D (Mostly orthotropic, personal communication).
- 1264 controls from eMERGE Geisinger eGenomic Medicine (GeM) MyCode Project (phs000381.v1.p1). Samples were genotyped using Omni Express Version: 12-v1\_c.

- 3747 cases and controls from the Genome-Wide Association Study of Fuchs' Endothelial Corneal Dystrophy (FECD) (phs000421.v1.p1). Samples were genotyped using Omni 2.5 Version: 4v\_1H. This study included samples from the AREDS study, and only non-AREDS samples were used as controls.
- 12595 cases from the Health and Retirement Study (HRS) (phs000428.v1.p1). Samples were genotyped using Omni 2.5 Version: 4v\_1D. Only samples of individuals of European origin were used (African Americans and Hispanics were excluded using principal components analysis).

### **Genotyping:**

All cases were processed on Illumina Infinium human Omniexpress\_24v1-0 arrays using the automated Infinium HTS Assay at Rutgers University Cell and DNA Repository (RUCDR) (Piscataway, New Jersey, USA). Samples were analyzed in two batches, plates 1-12 and plates 13-24. Plates 23 and 24 were comprised of “repeat” samples that failed during preliminary genotyping analysis. Samples were run against RUCDR technical controls. Genotype calling from intensity data was performed in Illumina GenomeStudio V2011.1, Genotyping module version 1.9.4. Mean genotype call rate among passing samples was 0.99 (SD: 0.0027). The arrays used for genotyping of controls had high number of overlapping SNPs with the Omniexpress\_24v1-0 arrays used for cases. This ensured a high SNP coverage in the merged case-control dataset.

### **Quality Control Procedures:**

Initial QC steps were performed in parallel within each of the five datasets (cases and four control sets) using PLINK v1.07<sup>1</sup> and Golden Helix SNP and Variation Suite 8 (SVS) (Golden Helix, Bozeman, MT, USA).

**SNP QC:** Non-mappable SNPs, and SNPs with overall call rates < 97%, minor allele

frequencies (MAF)  $< 0.01\%$  in autosomal markers, and Hardy Weinberg Equilibrium (HWE)  $< 1 \times 10^{-7}$  in controls were removed. SNPs were tested for differing missing rates given that different datasets were genotyped on different platforms and at different facilities and times. SNPs with a test  $P$  value  $< 1 \times 10^{-3}$  were removed. Because cases were run in two batches, QC metrics, differential missingness, and an association test were performed using batch indicator as a phenotype with case-control status. The resulting Q-Q plot showed no evidence of overdispersion to suggest a batch effect ( $\lambda=1.0$ ). SNPs were oriented to genome-forward orientation using SNPs from CEU HapMap3 individuals as a reference dataset (Release 3, NCBI build 36, dbSNP b126). Strand-ambiguous SNPs with an allele frequency difference of  $> 0.2$  between the observed MAF and the HapMap CEU reference data, and strand-ambiguous SNPs not present in the HapMap reference dataset were removed. SNPs passing all these steps were taken forward for imputation and downstream analysis. For X chromosome SNPs, the SNP call rate threshold of 97% was calculated using female samples only. For resolution of strand-ambiguous X chromosome SNPs, allele frequencies were calculated based on female samples only.

**Sample QC:** Samples with overall call rate  $< 95\%$  were excluded. X-chromosome heterozygosity rate was used to determine sex. Samples with ambiguous sex or with discrepant sex between reported phenotypic and genomic sex or female samples with a call rate  $< 95\%$  on the X chromosome were removed from the analysis.

While we allowed for known familial relatedness using a pre-computed kinship matrix, cryptic relatedness for each sample was evaluated using an identity-by-descent (IBD) method on an LD-pruned set of SNPs, and samples that were duplicates or of unknown relatedness were removed. Control datasets were then merged. To ensure that the merged controls did not exhibit population stratification effects, control-control GWASs were performed between each subset of controls, by coding one subset as cases and one as controls, and Q-Q plots were

drawn. SNPs showing any significant association and SNPs in regions of extended linkage disequilibrium were removed. Cases and controls were then merged and principal components were computed for all cases and controls with reference samples of known European ancestry (1000G British, CEU and Finland and Italian participants). Individuals causing population stratification and mismatched cases-controls in the merged dataset were removed. Principal components (PC) analysis was conducted using SVS package, which incorporates EIGENSTRAT software<sup>2</sup> based on a pruned set of autosomal SNPs. Participants with PC1 or PC2 values > 4 standard deviations from the known European ancestry group were excluded. The plots for the first principal components were drawn to visualize the genetic variance among the individuals in the merged datasets (**Figure S1**). We finally merged samples from discovery, replication and all control cohorts resulting in 337,204 overlapping SNPs. The reduction in number of overlapping SNPs occurred particularly upon merging of the discovery, replication and eMERGE datasets to the other controls.

### **Imputation:**

Cases and controls were combined into a single dataset for imputation.

**Pre-imputation QC and pre-phasing:** Prior to genotype imputation, several quality control measures were utilized to ensure that the genotyped data were compatible with the reference data set (European phase I integrated variant set release (v3) in NCBI build 37 (hg19) coordinates). First, SNP names and physical locations were updated to NCBI Build 37. Next, Strand orientation was assessed using SHAPEIT<sup>3,4</sup> and alleles were flipped when needed to match the alignment of the 1000G European data. SNPs not in 1000G reference data were excluded. Strand ambiguous genotyped SNPs (for example, A/T or C/G) were dropped from the input genotypes, particularly because they are under-represented on Illumina arrays. Lastly, to produce estimated haplotypes, each chromosome of the correctly aligned GWAS dataset was

phased in a single run using SHAPEIT.<sup>3,4</sup>

**Imputation:** Using the recommended settings, including an effective population size of 20,000, imputation of genotypes was conducted using the IMPUTE2 software program (version 2)<sup>5</sup> and haplotypes from all 379 European individuals in the 1000 Genomes March 2012 Data Release as a reference dataset. To facilitate parallel computation, imputation was run in 1Mb runs. Reference panel SNPs with a European minor allele frequency < 0.001 were not imputed. 14,882,799 SNPs were successfully imputed.

**Post-imputation QC:** Following imputation, quality score metrics of imputed SNPs were examined. SNPs were excluded for having an IMPUTE2 info score < 0.3 or MAF < 0.01. Mono or multi-allelic variants were also removed. For the purpose of this study, imputed indels and structural variants were excluded from downstream analysis. This resulted in 6,573,381 imputed SNPs that were used for the GWAS.

## B. SUPPLEMENTARY FIGURES AND LEGENDS

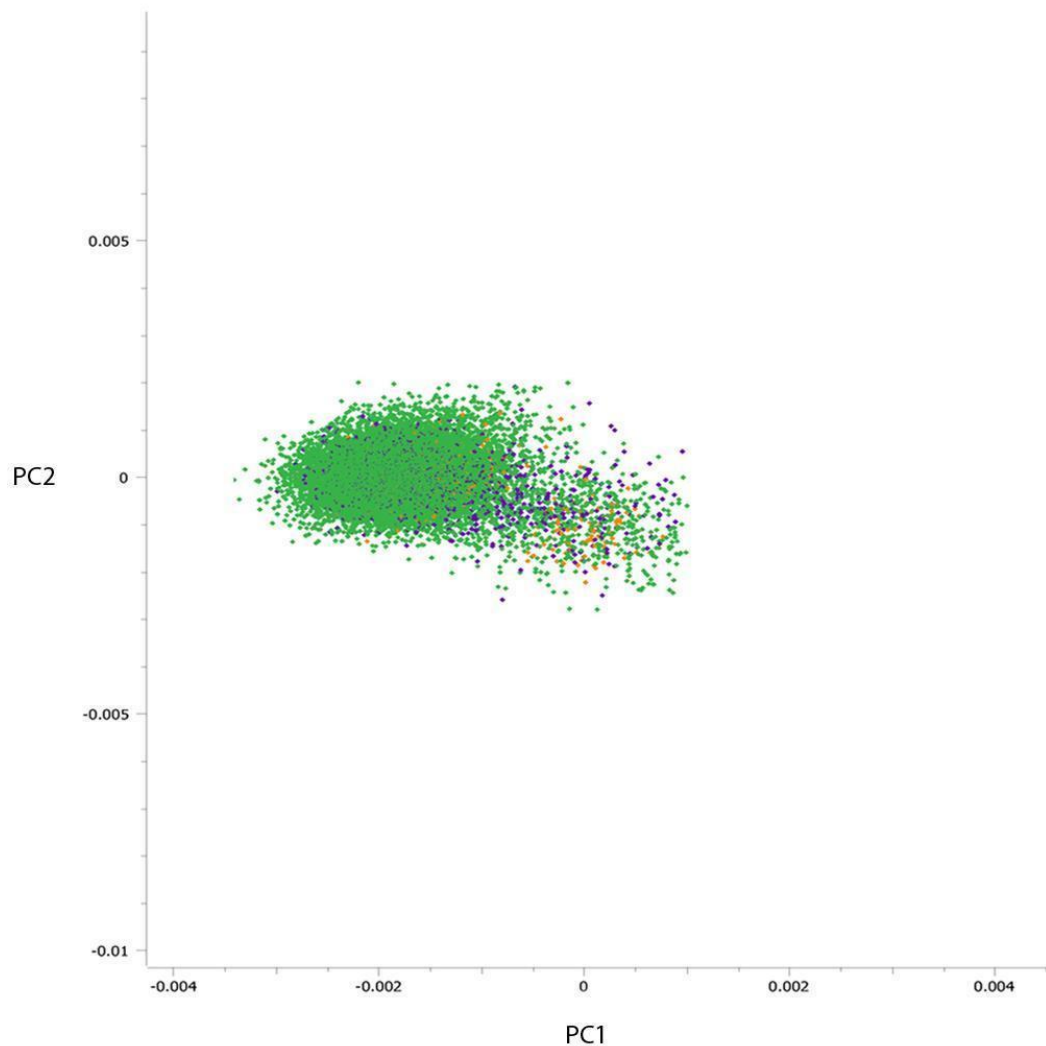

**Figure S1: Principal components analysis from all SNPs in the GWAS data set.**

Scatter plot of cases and controls positions on the first two principal components axes (PC1 and PC2) compared to European ancestry reference samples (1000G British, CEU and Finland and Italian participants). Orange dots represent reference samples, purple dots represent cases, and blue dots represent controls. Cases or controls with PC1 or PC2 values  $> 4$  standard deviations from the European ancestry group were excluded before the association tests (data shown are for the participants that passed the cutoff). PC =principal component.



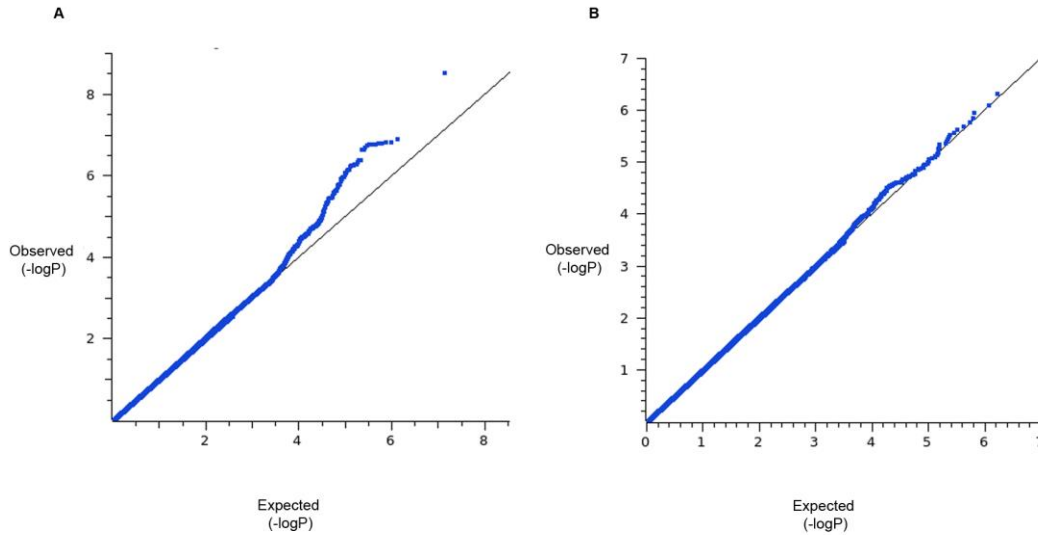

**Figure S2: Quantile-quantile (Q-Q) plots of the discovery cohorts.**

Q-Q plots created by SVS software for  $P$ -values obtained from the association analysis of the genotyped and imputed SNPs for **(A)** the 826 cases and 2991 controls in the non-accommodative esotropia discovery cohort, and **(B)** the 224 cases and 749 controls in the accommodative esotropia discovery cohort. We conducted genome-wide association testing using EMMAX (Efficient Mixed-Model Association eXpedited) with the first 3 principal components as covariates and a kinship matrix as a random effect. The x-axis shows the expected distribution of  $-\log_{10}(P\text{-values})$  under the null hypothesis of no association. The y-axis show the observed  $-\log_{10}(P\text{-values})$  in the association analysis. The curves are made of dots with each dot representing an observed  $-\log_{10}(P\text{-values})$  calculated for the SNP. The default lines show where  $x = y$ .

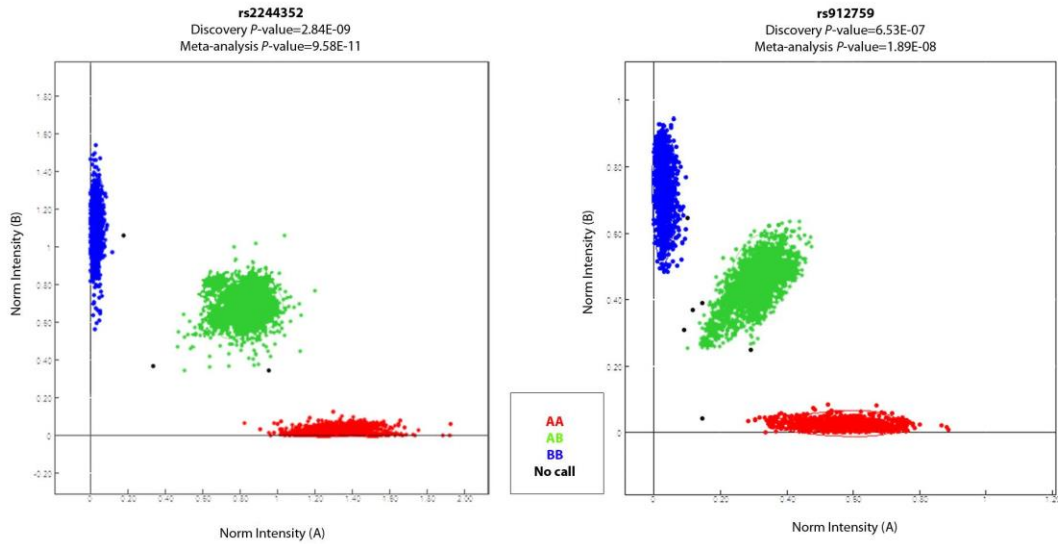

**Figure S3: Cluster plots for SNPs rs2244352 and rs912759.**

Cluster plots are shown for the most significantly associated SNP in the non-accommodative esotropia study (rs2244352, left) and in the accommodative esotropia cohort (rs912759, right) for all samples that passed quality control. The SNP genotypes were assigned based on cluster formation in scatter plots of normalized alleles A and B intensities. Each circle represents one individual's genotype. Red and blue clouds indicate homozygous genotypes for the SNP (AA, BB respectively), green cloud indicates heterozygous genotypes for the SNP (AB), and black dots indicate individuals with no SNP call.

**A**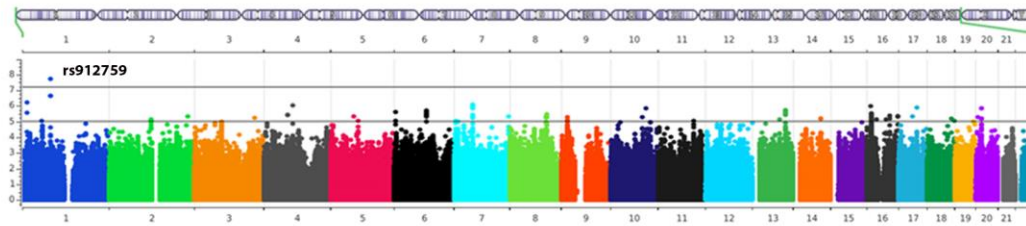**B**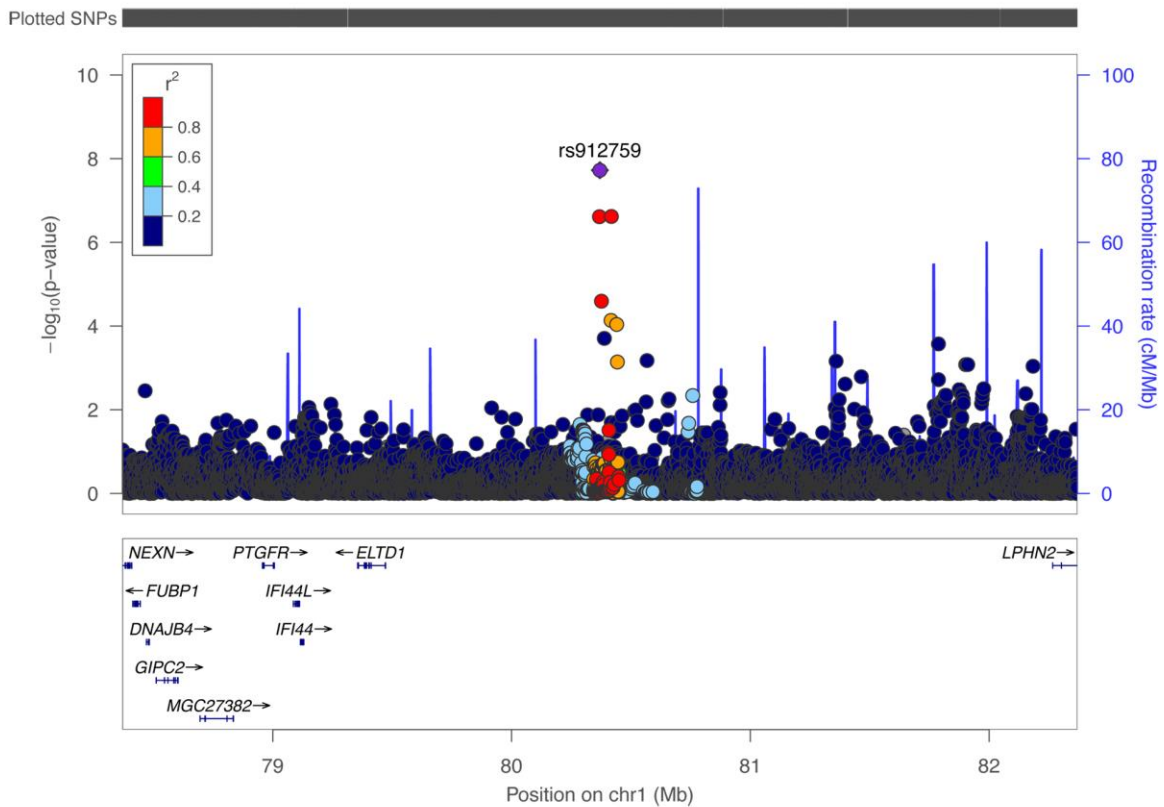

**Figure S4: Meta-analysis results of the accommodative esotropia cohort.**

**(A)** Manhattan plot of genome-wide fixed-effect meta-analysis results from the discovery (224 cases and 749 controls) and replication (66 cases and 264 controls) accommodative esotropia cohorts. The SNP rs912759 on chromosome 1p31.1 had a  $P = 1.89 \times 10^{-08}$ . Chromosomes are

represented by alternating colors and labeled on the x-axis. The y-axis represents the  $-\log_{10}$  ( $P$ -values). The upper horizontal line indicates the threshold for genome-wide significance ( $P < 5 \times 10^{-8}$ ) and the lower horizontal line indicates the threshold for suggestive association ( $P < 1 \times 10^{-5}$ ).

**(B)** SNP rs912759 regional association plot of the genome-wide meta-analysis of the discovery and replication accommodative esotropia cohorts. Rs912759 is shown as a solid purple diamond. The x-axis shows genomic location of SNPs on the chromosome 1p31.1 region, NCBI Build 37, together with the orientation of nearby genes. The y-axis is the  $-\log_{10}$  ( $P$ -value) computed for the displayed SNPs. The color scheme indicates linkage disequilibrium between rs912759 and other SNPs in the region using the  $r^2$  value calculated from the 1000 genomes project. Note that rs912759 falls in a gene desert and is separated by  $\sim 0.9$ Mb from the nearest telomeric gene (*ELTD1*) and  $\sim 1.9$  Mb from the nearest centromeric gene (*LPHN2*).

1 **C. SUPPLEMENTARY TABLES**

2 **Table S1: Numbers and origin of cases for discovery and replication and control cohorts.**

| <b>Cases</b>                                                                              |                        |                           |                  |
|-------------------------------------------------------------------------------------------|------------------------|---------------------------|------------------|
|                                                                                           | <b>Discovery</b>       | <b>Replication</b>        |                  |
|                                                                                           | <b>Origin</b>          |                           |                  |
| <b>Phenotype</b>                                                                          | <b>US</b>              | <b>UK</b>                 | <b>Australia</b> |
| Non-accommodative esotropia                                                               |                        |                           |                  |
| Esotropia                                                                                 | 464                    | 44                        | 448              |
| Infantile Esotropia                                                                       | 164                    | 7                         | 167              |
| Intermittent Esotropia                                                                    | 173                    | 4                         | 12               |
| Acquired Esotropia                                                                        | 11                     | (-)                       | 1                |
| Esophoria                                                                                 | 14                     | 3                         | 3                |
| Accommodative Esotropia                                                                   | 224                    | 36                        | 30               |
| <b>Controls</b>                                                                           |                        |                           |                  |
| <b>Study</b>                                                                              | <b>Case (included)</b> | <b>Control (included)</b> | <b>Ethnicity</b> |
| NEI Age-Related Eye Disease Study (AREDS) Genetic Variation in Refractive Error Substudy* | (-)                    | 1877 (1707)               | 100% Caucasian   |
| eMERGE Geisinger eGenomic Medicine (GeM) MyCode Project Controls                          | (-)                    | 1264 (1127)               | 100% Caucasian   |
| Genome-Wide Association Study of Fuchs' Endothelial Corneal Dystrophy (FECD)              | 3747 (1451)            |                           | >99% White       |
| Health and Retirement Study (HRS)                                                         | 112595 (9287)          | (-)                       | 83% White        |

3  
4 Table S1: Numbers of cases for discovery and replication broken by phenotype and controls derived from the database of Genotypes and  
5 Phenotypes (dbGaP). Numbers in between parenthesis indicate samples that were included in association testing after excluding samples  
6 failing quality control, those of non-white ethnicity, or duplicates. \*Mostly orthotropic (personal communication).  
7 Abbreviations as follows: US: United States; UK: United Kingdom.

8  
9  
10**Table S2: Analysis results for top SNPs in the non-accommodative esotropia discovery cohort and the matching replication results.**

| Marker      | Chromosome | Position  | Minor Allele (Risk Allele) | Major Allele | Gene         | P-Value  | OR   | Allele Freq. (Cases / Controls) | P-Value (Replication) | Odds Ratio (Replication) | Allele Freq. (Replication Cases / Controls) | Replication in same direction |
|-------------|------------|-----------|----------------------------|--------------|--------------|----------|------|---------------------------------|-----------------------|--------------------------|---------------------------------------------|-------------------------------|
| rs12035677  | 1          | 232526955 | A                          | G            | (-)          | 2.37E-06 | 1.56 | 0.08/0.05                       | 0.36                  | 0.91                     | 0.05/0.06                                   | N                             |
| rs748423    | 2          | 52571595  | A                          | G            | LOC730100    | 8.26E-06 | 0.73 | 0.28/0.35                       | 0.10                  | 0.91                     | 0.33/0.35                                   | Y                             |
| rs80238534  | 2          | 52620055  | G                          | C            | LOC730100    | 5.92E-06 | 0.73 | 0.28/0.35                       | 0.18                  | 0.92                     | 0.33/0.35                                   | Y                             |
| rs12468960  | 2          | 52623680  | A                          | G            | LOC730100    | 8.47E-06 | 0.73 | 0.27/0.34                       | 0.18                  | 0.92                     | 0.32/0.34                                   | Y                             |
| rs4971596   | 2          | 52624594  | A                          | G            | LOC730100    | 7.31E-06 | 0.73 | 0.28/0.35                       | 0.16                  | 0.92                     | 0.33/0.35                                   | Y                             |
| rs4971815   | 2          | 52624780  | G                          | A            | LOC730100    | 9.83E-06 | 0.74 | 0.28/0.35                       | 0.15                  | 0.91                     | 0.33/0.35                                   | Y                             |
| rs2276695   | 2          | 118814868 | T                          | C            | LOC102723413 | 3.66E-06 | 1.29 | 0.41/0.35                       | 0.20                  | 1.07                     | 0.37/0.36                                   | Y                             |
| rs2228946   | 7          | 116918085 | T                          | C            | WNT2         | 3.30E-06 | 0.70 | 0.18/0.24                       | 0.32                  | 1.11                     | 0.23/0.21                                   | N                             |
| rs10503319  | 8          | 5518699   | A                          | G            | (-)          | 4.50E-06 | 1.48 | 0.13/0.09                       | 0.50                  | 1.08                     | 0.11/0.10                                   | Y                             |
| rs58555057  | 8          | 6002099   | G                          | A            | (-)          | 4.09E-06 | 0.64 | 0.07/0.11                       | 0.66                  | 0.98                     | 0.14/0.12                                   | N                             |
| rs918924    | 8          | 6002470   | A                          | G            | (-)          | 6.84E-06 | 0.67 | 0.09/0.13                       | 0.75                  | 0.98                     | 0.11/0.11                                   | Y                             |
| rs11136975  | 8          | 6006443   | G                          | A            | (-)          | 7.26E-06 | 0.65 | 0.08/0.12                       | 0.36                  | 0.93                     | 0.10/0.11                                   | Y                             |
| rs12678986  | 8          | 6009805   | C                          | G            | (-)          | 5.41E-06 | 0.66 | 0.08/0.13                       | 0.40                  | 0.93                     | 0.11/0.11                                   | Y                             |
| rs76426181  | 8          | 6014282   | T                          | C            | (-)          | 6.41E-06 | 0.64 | 0.08/0.12                       | 0.30                  | 0.92                     | 0.10/0.11                                   | Y                             |
| rs7948560   | 11         | 79169447  | C                          | G            | (-)          | 7.54E-06 | 0.45 | 0.01/0.03                       | 0.16                  | 1.22                     | 0.03/0.03                                   | Y                             |
| rs10790166  | 11         | 116779499 | G                          | A            | SIK3         | 3.02E-06 | 1.39 | 0.3/0.24                        | 0.62                  | 0.99                     | 0.23/0.23                                   | Y                             |
| rs7123336   | 11         | 116782819 | C                          | T            | SIK3         | 1.63E-06 | 1.41 | 0.29/0.23                       | 0.82                  | 1.01                     | 0.22/0.22                                   | Y                             |
| rs983567    | 11         | 116783600 | C                          | T            | SIK3         | 1.63E-06 | 1.41 | 0.29/0.23                       | 0.82                  | 1.01                     | 0.22/0.22                                   | Y                             |
| rs7107702   | 11         | 116804144 | C                          | T            | SIK3         | 5.73E-07 | 1.44 | 0.28/0.21                       | 0.82                  | 1.05                     | 0.21/0.20                                   | Y                             |
| rs2513094   | 11         | 116806412 | C                          | T            | SIK3         | 5.02E-07 | 1.42 | 0.3/0.23                        | 0.93                  | 1.03                     | 0.22/0.22                                   | Y                             |
| rs61907604  | 11         | 116818407 | G                          | A            | SIK3         | 7.97E-07 | 1.43 | 0.28/0.21                       | 0.69                  | 1.06                     | 0.21/0.20                                   | Y                             |
| rs112704540 | 11         | 116818527 | G                          | A            | SIK3         | 7.97E-07 | 1.43 | 0.28/0.21                       | 0.69                  | 1.06                     | 0.21/0.20                                   | Y                             |
| rs6589580   | 11         | 116819873 | A                          | G            | SIK3         | 1.20E-06 | 1.43 | 0.30/0.23                       | 0.62                  | 1.09                     | 0.26/0.21                                   | Y                             |
| rs1940626   | 11         | 116828121 | C                          | T            | SIK3         | 6.94E-07 | 1.43 | 0.28/0.21                       | 0.69                  | 1.06                     | 0.21/0.20                                   | Y                             |
| rs682048    | 11         | 116828320 | G                          | T            | SIK3         | 5.06E-07 | 1.42 | 0.30/0.23                       | 0.94                  | 1.04                     | 0.22/0.22                                   | Y                             |
| rs1815789   | 11         | 116834953 | C                          | T            | SIK3         | 6.94E-07 | 1.43 | 0.28/0.21                       | 0.74                  | 1.06                     | 0.21/0.20                                   | Y                             |
| rs1815788   | 11         | 116834971 | C                          | T            | SIK3         | 6.94E-07 | 1.43 | 0.28/0.21                       | 0.74                  | 1.06                     | 0.21/0.20                                   | Y                             |
| rs2513097   | 11         | 116836212 | G                          | A            | SIK3         | 5.14E-07 | 1.41 | 0.29/0.23                       | 0.99                  | 1.03                     | 0.22/0.22                                   | Y                             |
| rs1241655   | 11         | 116837808 | T                          | G            | SIK3         | 5.88E-07 | 1.41 | 0.29/0.23                       | 0.99                  | 1.03                     | 0.22/0.22                                   | Y                             |
| rs7941927   | 11         | 116838904 | G                          | A            | SIK3         | 4.62E-07 | 1.44 | 0.28/0.21                       | 0.69                  | 1.06                     | 0.21/0.20                                   | Y                             |
| rs509171    | 11         | 116848857 | T                          | C            | SIK3         | 1.23E-07 | 1.43 | 0.30/0.23                       | 0.88                  | 1.04                     | 0.22/0.22                                   | Y                             |
| rs4938321   | 11         | 116852507 | T                          | C            | SIK3         | 1.43E-07 | 1.45 | 0.28/0.21                       | 0.63                  | 1.07                     | 0.21/0.20                                   | Y                             |
| rs7939934   | 11         | 116861268 | T                          | A            | SIK3         | 5.29E-07 | 1.45 | 0.28/0.22                       | 0.71                  | 1.06                     | 0.21/0.21                                   | Y                             |
| rs6589583   | 11         | 116863766 | T                          | C            | SIK3         | 1.58E-07 | 1.43 | 0.30/0.23                       | 0.88                  | 1.07                     | 0.22/0.22                                   | Y                             |
| rs10892054  | 11         | 116868221 | T                          | C            | SIK3         | 1.66E-07 | 1.45 | 0.28/0.21                       | 0.61                  | 1.07                     | 0.21/0.20                                   | Y                             |
| rs10892055  | 11         | 116868371 | A                          | G            | SIK3         | 1.66E-07 | 1.45 | 0.28/0.21                       | 0.61                  | 1.07                     | 0.21/0.20                                   | Y                             |
| rs7930264   | 11         | 116870766 | A                          | G            | SIK3         | 1.58E-07 | 1.43 | 0.30/0.23                       | 0.88                  | 1.04                     | 0.22/0.22                                   | Y                             |

|            |    |           |   |   |      |          |      |           |      |      |           |   |
|------------|----|-----------|---|---|------|----------|------|-----------|------|------|-----------|---|
| rs6589587  | 11 | 116875338 | G | T | SIK3 | 1.66E-07 | 1.45 | 0.28/0.21 | 0.61 | 1.07 | 0.21/0.20 | Y |
| rs7931398  | 11 | 116879676 | C | T | SIK3 | 5.83E-06 | 1.36 | 0.31/0.25 | 0.82 | 1.05 | 0.25/0.24 | Y |
| rs7119185  | 11 | 116886096 | T | C | SIK3 | 1.48E-07 | 1.45 | 0.28/0.21 | 0.59 | 1.07 | 0.21/0.20 | Y |
| rs7128772  | 11 | 116889411 | A | T | SIK3 | 1.10E-06 | 1.40 | 0.30/0.23 | 0.96 | 1.03 | 0.22/0.21 | Y |
| rs10466590 | 11 | 116894413 | G | C | SIK3 | 3.95E-07 | 1.42 | 0.30/0.23 | 0.97 | 1.04 | 0.22/0.22 | Y |
| rs11216241 | 11 | 116899249 | C | A | SIK3 | 1.67E-07 | 1.43 | 0.30/0.23 | 0.88 | 1.04 | 0.22/0.26 | Y |
| rs11600552 | 11 | 116900947 | C | T | SIK3 | 3.95E-07 | 1.42 | 0.30/0.23 | 0.97 | 1.03 | 0.22/0.22 | Y |
| rs4548653  | 11 | 116903316 | A | G | SIK3 | 3.97E-07 | 1.44 | 0.28/0.21 | 0.70 | 1.07 | 0.21/0.20 | Y |
| rs4938327  | 11 | 116906728 | C | T | SIK3 | 5.44E-07 | 1.44 | 0.28/0.21 | 0.70 | 1.07 | 0.21/0.20 | Y |
| rs3181     | 11 | 116907043 | A | G | SIK3 | 2.29E-07 | 1.45 | 0.28/0.21 | 0.61 | 1.07 | 0.21/0.20 | Y |
| rs721783   | 11 | 116907449 | T | C | SIK3 | 2.29E-07 | 1.45 | 0.28/0.21 | 0.61 | 1.07 | 0.21/0.20 | Y |
| rs7118591  | 11 | 116908457 | A | C | SIK3 | 5.44E-07 | 1.44 | 0.28/0.21 | 0.70 | 1.07 | 0.21/0.20 | Y |
| rs11216244 | 11 | 116912730 | T | C | SIK3 | 7.34E-07 | 1.42 | 0.30/0.23 | 0.81 | 1.05 | 0.22/0.21 | Y |
| rs11216245 | 11 | 116913202 | T | C | SIK3 | 8.15E-07 | 1.41 | 0.30/0.23 | 0.83 | 1.05 | 0.22/0.22 | Y |
| rs12279066 | 11 | 116913909 | G | C | SIK3 | 2.08E-06 | 1.42 | 0.29/0.22 | 0.76 | 1.05 | 0.22/0.21 | Y |
| rs10892066 | 11 | 116920927 | T | C | SIK3 | 2.27E-06 | 1.40 | 0.30/0.23 | 0.98 | 1.03 | 0.22/0.22 | Y |
| rs3886960  | 11 | 116924990 | T | G | SIK3 | 2.27E-06 | 1.40 | 0.30/0.23 | 0.99 | 1.03 | 0.22/0.22 | Y |
| rs723955   | 11 | 116925042 | A | G | SIK3 | 2.27E-06 | 1.40 | 0.30/0.23 | 0.99 | 1.03 | 0.22/0.22 | Y |
| rs7108912  | 11 | 116925996 | A | G | SIK3 | 2.48E-06 | 1.40 | 0.30/0.23 | 0.99 | 1.03 | 0.22/0.22 | Y |
| rs7124872  | 11 | 116927951 | G | A | SIK3 | 2.48E-06 | 1.40 | 0.30/0.23 | 0.99 | 1.03 | 0.22/0.22 | Y |
| rs7124996  | 11 | 116928006 | T | C | SIK3 | 2.21E-06 | 1.40 | 0.29/0.23 | 0.99 | 1.03 | 0.22/0.22 | Y |
| rs4938329  | 11 | 116928112 | T | C | SIK3 | 2.48E-06 | 1.40 | 0.29/0.23 | 0.99 | 1.03 | 0.22/0.22 | Y |
| rs4938330  | 11 | 116928514 | G | C | SIK3 | 1.96E-07 | 1.47 | 0.26/0.2  | 0.99 | 1.03 | 0.19/0.19 | Y |
| rs11216255 | 11 | 116929995 | G | A | SIK3 | 1.53E-06 | 1.41 | 0.30/0.23 | 0.97 | 1.04 | 0.22/0.22 | Y |
| rs7101763  | 11 | 116941985 | T | G | SIK3 | 1.06E-06 | 1.43 | 0.28/0.21 | 0.97 | 1.05 | 0.21/0.20 | Y |
| rs7109649  | 11 | 116943544 | T | C | SIK3 | 1.55E-06 | 1.42 | 0.30/0.23 | 0.98 | 1.04 | 0.22/0.22 | Y |
| rs1531706  | 11 | 116943952 | A | C | SIK3 | 3.41E-06 | 1.41 | 0.29/0.23 | 0.92 | 1.03 | 0.22/0.22 | Y |
| rs7935913  | 11 | 116944348 | A | G | SIK3 | 3.41E-06 | 1.41 | 0.29/0.23 | 0.92 | 1.03 | 0.22/0.22 | Y |
| rs7935834  | 11 | 116944437 | G | C | SIK3 | 3.41E-06 | 1.41 | 0.29/0.23 | 0.92 | 1.03 | 0.22/0.22 | Y |
| rs1531707  | 11 | 116944712 | A | G | SIK3 | 3.41E-06 | 1.41 | 0.29/0.23 | 0.92 | 1.03 | 0.22/0.22 | Y |
| rs4620758  | 11 | 116945718 | A | G | SIK3 | 9.27E-07 | 1.43 | 0.28/0.21 | 0.97 | 1.05 | 0.22/0.22 | Y |
| rs12274388 | 11 | 116946238 | T | C | SIK3 | 3.41E-06 | 1.41 | 0.29/0.23 | 0.92 | 1.03 | 0.22/0.22 | Y |
| rs7130213  | 11 | 116946652 | A | C | SIK3 | 1.04E-06 | 1.44 | 0.28/0.21 | 0.94 | 1.05 | 0.22/0.20 | Y |
| rs7484045  | 11 | 116946890 | T | C | SIK3 | 3.41E-06 | 1.41 | 0.29/0.23 | 0.92 | 1.03 | 0.22/0.22 | Y |
| rs10082609 | 11 | 116949074 | T | C | SIK3 | 3.41E-06 | 1.41 | 0.29/0.23 | 0.92 | 1.03 | 0.22/0.22 | Y |
| rs11216266 | 11 | 116950150 | C | T | SIK3 | 3.41E-06 | 1.41 | 0.29/0.23 | 0.92 | 1.03 | 0.22/0.22 | Y |
| rs7106662  | 11 | 116951385 | C | T | SIK3 | 3.41E-06 | 1.41 | 0.29/0.23 | 0.92 | 1.03 | 0.22/0.22 | Y |
| rs1871756  | 11 | 116953645 | A | G | SIK3 | 1.06E-06 | 1.43 | 0.28/0.21 | 0.97 | 1.04 | 0.21/0.20 | Y |
| rs10892071 | 11 | 116954565 | T | C | SIK3 | 4.09E-06 | 1.41 | 0.29/0.23 | 0.98 | 1.04 | 0.22/0.21 | Y |
| rs61903416 | 11 | 116955049 | C | T | SIK3 | 3.41E-06 | 1.41 | 0.29/0.23 | 0.92 | 1.03 | 0.22/0.22 | Y |
| rs12274465 | 11 | 116957189 | T | C | SIK3 | 4.37E-06 | 1.40 | 0.29/0.23 | 0.92 | 1.03 | 0.22/0.22 | Y |
| rs7950093  | 11 | 116963519 | T | G | SIK3 | 1.90E-06 | 1.41 | 0.29/0.23 | 0.83 | 1.03 | 0.22/0.22 | Y |
| rs12269901 | 11 | 116973929 | C | G | (-)  | 1.53E-06 | 1.35 | 0.34/0.28 | 0.85 | 1.06 | 0.27/0.26 | Y |
| rs4388921  | 11 | 116976778 | C | T | (-)  | 1.02E-06 | 1.44 | 0.28/0.22 | 0.76 | 1.07 | 0.21/0.20 | Y |
| rs12271169 | 11 | 116980021 | G | C | (-)  | 2.39E-06 | 1.42 | 0.27/0.21 | 0.98 | 1.05 | 0.21/0.20 | Y |
| rs7112111  | 11 | 116980858 | G | T | (-)  | 2.70E-06 | 1.41 | 0.27/0.21 | 0.88 | 1.06 | 0.21/0.20 | Y |
| rs7104023  | 11 | 116982602 | T | A | (-)  | 2.98E-06 | 1.41 | 0.27/0.21 | 0.72 | 1.07 | 0.21/0.20 | Y |
| rs10892075 | 11 | 116982821 | T | C | (-)  | 1.75E-07 | 1.49 | 0.24/0.18 | 0.63 | 1.08 | 0.18/0.17 | Y |

|             |    |           |   |   |        |          |      |           |      |      |           |   |
|-------------|----|-----------|---|---|--------|----------|------|-----------|------|------|-----------|---|
| rs111765459 | 11 | 117083373 | C | T | PCSK7  | 1.70E-06 | 1.40 | 0.25/.19  | 0.46 | 1.06 | 0.21/0.19 | Y |
| rs4938358   | 11 | 117084091 | T | C | PCSK7  | 1.20E-06 | 1.40 | 0.25/.19  | 0.42 | 1.06 | 0.21/0.19 | Y |
| rs12418744  | 11 | 117084537 | A | G | PCSK7  | 1.36E-06 | 1.40 | 0.25/.19  | 0.42 | 1.06 | 0.21/0.19 | Y |
| rs28704046  | 11 | 117086058 | T | C | PCSK7  | 2.99E-06 | 1.39 | 0.25/.19  | 0.34 | 1.07 | 0.21/0.19 | Y |
| rs2238006   | 11 | 117087792 | C | A | PCSK7  | 5.45E-06 | 1.39 | 0.25/0.2  | 0.41 | 1.06 | 0.21/0.20 | Y |
| rs2239012   | 11 | 117088362 | G | A | PCSK7  | 4.08E-06 | 1.38 | 0.25/0.19 | 0.34 | 1.07 | 0.21/0.19 | N |
| rs2239011   | 11 | 117088994 | G | A | PCSK7  | 4.60E-06 | 1.38 | 0.25/0.19 | 0.31 | 1.07 | 0.20/0.22 | Y |
| rs2239010   | 11 | 117089006 | C | G | PCSK7  | 4.60E-06 | 1.38 | 0.25/0.19 | 0.34 | 1.07 | 0.21/0.19 | Y |
| rs3882895   | 11 | 117090545 | C | T | PCSK7  | 4.60E-06 | 1.38 | 0.25/0.19 | 0.34 | 1.07 | 0.21/0.19 | Y |
| rs3882897   | 11 | 117091227 | A | G | PCSK7  | 8.61E-06 | 1.38 | 0.25/0.19 | 0.34 | 1.07 | 0.21/0.19 | Y |
| rs4936368   | 11 | 117093486 | T | C | PCSK7  | 7.12E-06 | 1.38 | 0.25/0.19 | 0.34 | 1.07 | 0.21/0.19 | Y |
| rs4938359   | 11 | 117093560 | G | A | PCSK7  | 7.12E-06 | 1.38 | 0.25/0.19 | 0.34 | 1.07 | 0.21/0.19 | Y |
| rs3830008   | 11 | 117093764 | C | A | PCSK7  | 5.49E-06 | 1.37 | 0.25/0.2  | 0.24 | 0.91 | 0.20/0.22 | Y |
| rs74579438  | 13 | 68967325  | G | A | (-)    | 4.77E-06 | 1.77 | 0.07/0.04 | 0.52 | 1.22 | 0.06/0.05 | Y |
| rs6562524   | 13 | 68978085  | G | A | (-)    | 4.77E-06 | 1.77 | 0.07/0.04 | 0.52 | 1.21 | 0.06/0.05 | Y |
| rs9541348   | 13 | 68984434  | G | C | (-)    | 4.77E-06 | 1.77 | 0.07/0.04 | 0.52 | 1.22 | 0.06/0.05 | Y |
| rs12329628  | 20 | 60168573  | G | A | CDH4   | 9.50E-06 | 2.36 | 0.04/0.02 | 0.94 | 0.98 | 0.01/0.02 | N |
| rs2244352   | 21 | 40757973  | T | G | WRB    | 2.84E-09 | 1.41 | 0.39/0.31 | 0.01 | 1.23 | 0.37/0.32 | Y |
| rs2837043   | 21 | 40851556  | T | G | SH3BGR | 3.36E-06 | 1.28 | 0.52/0.46 | 0.06 | 1.14 | 0.48/0.45 | Y |

11  
12  
13  
14  
15

Table S2. Analysis results for top SNPs with  $P \leq 1 \times 10^{-05}$  in the non-accommodative esotropia discovery cohort and the matching results from the replication cohort. Abbreviations are as follows: OR, Odds Ratio; Freq, frequency; Y, yes; N, no.



16  
17

**Table S3: Analysis results for the accommodative esotropia discovery and replication cohorts and their meta-analysis:**

| Marker      | Chromosome | Position  | Minor Allele (Risk Allele) | Major Allele | Gene         | P-Value  | OR   | MAF Cases/Control Is (Discovery) | P-Value (Replication) | OR (Replication) | MAF Cases/Control Is (Replication) | Same direction | Overall P-Value | RE Analysis P-Value |
|-------------|------------|-----------|----------------------------|--------------|--------------|----------|------|----------------------------------|-----------------------|------------------|------------------------------------|----------------|-----------------|---------------------|
| rs10874098  | 1          | 80367960  | C                          | A            | (-)          | 4.57E-06 | 0.62 | 0.39/0.51                        | 0.02                  | 0.62             | 0.38/0.50                          | Y              | 2.43E-07        | 2.43E-07            |
| rs912759    | 1          | 80369902  | T                          | C            | (-)          | 6.53E-07 | 0.59 | 0.37/0.50                        | 0.01                  | 0.59             | 0.37/0.50                          | Y              | 1.89E-08        | 1.89E-08            |
| rs1325201   | 1          | 80417950  | G                          | T            | (-)          | 9.17E-07 | 0.61 | 0.41/0.53                        | 0.06                  | 1.37             | 0.57/0.49                          | N              | 2.40E-07        | 2.85E-05            |
| rs10165003  | 2          | 2488285   | A                          | G            | LOC105373389 | 1.63E-06 | 3.20 | 0.08/0.03                        | 0.83                  | 1.27             | 0.06/0.05                          | Y              | 4.98E-05        | 2.36E-01            |
| rs13422123  | 2          | 2497967   | A                          | T            | LOC105373389 | 8.53E-06 | 3.00 | 0.07/0.03                        | 0.83                  | 1.27             | 0.06/0.05                          | Y              | 1.90E-04        | 2.33E-01            |
| rs57739605  | 2          | 64341674  | C                          | T            | PELI1        | 4.44E-06 | 3.22 | 0.07/0.03                        | 0.96                  | 0.64             | 0.03/0.04                          | N              | 1.32E-04        | 3.04E-01            |
| rs148499834 | 2          | 166993731 | T                          | C            | LOC101929680 | 3.94E-06 | 3.23 | 0.07/0.02                        | 0.44                  | 1.39             | 0.04/0.03                          | Y              | 1.56E-05        | 6.74E-02            |
| rs72899664  | 2          | 188795932 | T                          | C            | (-)          | 7.99E-06 | 1.79 | 0.22/0.14                        | 0.24                  | 0.64             | 0.10/0.14                          | N              | 1.43E-03        | 6.51E-01            |
| rs72899666  | 2          | 188797372 | T                          | C            | (-)          | 7.99E-06 | 1.77 | 0.22/0.14                        | 0.24                  | 0.63             | 0.10/0.14                          | N              | 1.43E-03        | 6.51E-01            |
| rs12373649  | 2          | 188799373 | C                          | G            | (-)          | 4.73E-06 | 1.81 | 0.22/0.13                        | 0.30                  | 0.63             | 0.10/0.14                          | N              | 8.00E-04        | 6.08E-01            |
| rs12373745  | 2          | 188799624 | C                          | T            | (-)          | 2.95E-06 | 1.90 | 0.23/0.14                        | 0.29                  | 0.65             | 0.10/0.14                          | N              | 6.28E-04        | 6.10E-01            |
| rs112142841 | 3          | 32206837  | T                          | G            | GPD1L        | 1.44E-06 | 4.70 | 0.05/0.02                        | 0.99                  | 0.57             | 0.01/0.02                          | N              | 1.80E-05        | 2.66E-01            |
| rs4690624   | 4          | 179220327 | T                          | G            | (-)          | 3.94E-06 | 0.61 | 0.32/0.44                        | 0.69                  | 0.91             | 0.41/0.44                          | Y              | 4.68E-05        | 1.71E-01            |
| rs7687222   | 4          | 179222898 | A                          | G            | (-)          | 5.61E-06 | 0.61 | 0.32/0.43                        | 0.69                  | 0.91             | 0.41/0.44                          | Y              | 6.07E-05        | 1.68E-01            |
| rs56164674  | 4          | 179225080 | T                          | C            | (-)          | 9.71E-06 | 0.63 | 0.33/0.44                        | 0.65                  | 0.89             | 0.41/0.44                          | Y              | 7.98E-05        | 1.47E-01            |
| rs2890006   | 4          | 179225462 | T                          | C            | (-)          | 5.19E-06 | 0.62 | 0.32/0.44                        | 0.65                  | 0.91             | 0.41/0.44                          | Y              | 5.02E-05        | 1.53E-01            |
| rs62341375  | 4          | 179226092 | G                          | A            | (-)          | 8.10E-06 | 0.62 | 0.32/0.43                        | 0.65                  | 0.91             | 0.41/0.44                          | Y              | 6.96E-05        | 1.48E-01            |
| rs9992600   | 4          | 179226351 | T                          | C            | (-)          | 5.19E-06 | 0.63 | 0.32/0.44                        | 0.65                  | 0.91             | 0.41/0.44                          | Y              | 5.02E-05        | 1.53E-01            |
| rs1574851   | 4          | 179226719 | T                          | C            | (-)          | 9.71E-06 | 0.62 | 0.33/0.44                        | 0.65                  | 0.89             | 0.41/0.44                          | Y              | 7.98E-05        | 1.47E-01            |
| rs1574850   | 4          | 179226841 | A                          | G            | (-)          | 6.79E-06 | 0.62 | 0.33/0.44                        | 0.65                  | 0.89             | 0.41/0.44                          | Y              | 6.07E-05        | 1.50E-01            |
| rs6552292   | 4          | 179226871 | A                          | G            | (-)          | 5.19E-06 | 0.62 | 0.32/0.44                        | 0.65                  | 0.91             | 0.41/0.44                          | Y              | 5.02E-05        | 1.53E-01            |
| rs1510639   | 4          | 179227356 | G                          | A            | (-)          | 5.17E-06 | 0.62 | 0.32/0.44                        | 0.65                  | 0.91             | 0.41/0.44                          | Y              | 4.94E-05        | 1.52E-01            |
| rs1567475   | 4          | 179227598 | T                          | C            | (-)          | 8.10E-06 | 0.62 | 0.32/0.43                        | 0.65                  | 0.91             | 0.41/0.44                          | Y              | 6.96E-05        | 1.48E-01            |
| rs6830610   | 4          | 179227841 | G                          | A            | (-)          | 8.92E-06 | 0.62 | 0.33/0.44                        | 0.65                  | 0.89             | 0.41/0.44                          | Y              | 7.50E-05        | 1.47E-01            |
| rs1567474   | 4          | 179227880 | A                          | G            | (-)          | 5.19E-06 | 0.62 | 0.32/0.44                        | 0.77                  | 0.91             | 0.41/0.44                          | Y              | 7.30E-05        | 1.99E-01            |
| rs2666089   | 4          | 179229036 | A                          | C            | (-)          | 5.19E-06 | 0.62 | 0.32/0.44                        | 0.65                  | 0.91             | 0.41/0.44                          | Y              | 5.02E-05        | 1.53E-01            |
| rs1912518   | 4          | 179230381 | G                          | T            | (-)          | 9.71E-06 | 0.63 | 0.33/0.44                        | 0.65                  | 0.89             | 0.41/0.44                          | Y              | 7.98E-05        | 1.47E-01            |
| rs1510638   | 4          | 179232092 | C                          | A            | (-)          | 9.71E-06 | 0.63 | 0.33/0.44                        | 0.65                  | 0.89             | 0.41/0.44                          | Y              | 7.98E-05        | 1.47E-01            |
| rs6828485   | 4          | 179232789 | A                          | G            | (-)          | 5.17E-06 | 0.62 | 0.32/0.44                        | 0.65                  | 0.91             | 0.41/0.44                          | Y              | 4.94E-05        | 1.52E-01            |
| rs10064966  | 5          | 9672684   | T                          | C            | LOC285692    | 9.11E-06 | 1.91 | 0.24/0.15                        | 0.33                  | 0.91             | 0.15/0.16                          | N              | 1.59E-03        | 5.88E-01            |
| rs12109904  | 5          | 9681798   | T                          | C            | LOC285692    | 1.41E-06 | 1.97 | 0.25/0.15                        | 0.33                  | 0.92             | 0.15/0.16                          | N              | 4.48E-04        | 5.69E-01            |
| rs10039101  | 5          | 9689026   | T                          | G            | LOC285692    | 6.13E-06 | 1.95 | 0.23/0.13                        | 0.12                  | 0.72             | 0.11/0.14                          | N              | 2.31E-03        | 7.45E-01            |
| rs1482671   | 5          | 44362538  | G                          | A            | FGF10        | 7.99E-06 | 0.61 | 0.26/0.37                        | 0.91                  | 0.90             | 0.36/0.38                          | Y              | 1.39E-04        | 2.48E-01            |
| rs1482672   | 5          | 44362769  | C                          | T            | FGF10        | 7.99E-06 | 0.61 | 0.26/0.37                        | 0.91                  | 0.90             | 0.36/0.38                          | Y              | 1.39E-04        | 2.48E-01            |
| rs2121875   | 5          | 44365545  | C                          | A            | FGF10        | 9.55E-06 | 0.60 | 0.26/0.37                        | 0.91                  | 0.90             | 0.36/0.38                          | Y              | 1.60E-04        | 2.47E-01            |
| rs6859730   | 5          | 44367221  | A                          | T            | FGF10        | 6.33E-06 | 0.60 | 0.26/0.37                        | 0.91                  | 0.90             | 0.36/0.38                          | Y              | 1.18E-04        | 2.49E-01            |
| rs1482673   | 5          | 44368123  | G                          | A            | FGF10        | 6.98E-06 | 0.60 | 0.26/0.37                        | 0.91                  | 0.90             | 0.36/0.38                          | Y              | 1.28E-04        | 2.49E-01            |
| rs900379    | 5          | 44369656  | C                          | T            | FGF10        | 7.80E-06 | 0.61 | 0.26/0.37                        | 0.91                  | 0.90             | 0.36/0.38                          | Y              | 1.39E-04        | 2.49E-01            |

|             |    |          |   |   |           |          |      |           |      |      |           |   |          |          |
|-------------|----|----------|---|---|-----------|----------|------|-----------|------|------|-----------|---|----------|----------|
| rs4737265   | 8  | 69888286 | T | C | LINC01592 | 2.52E-06 | 1.93 | 0.25/0.15 | 0.66 | 0.79 | 0.13/0.16 | N | 1.64E-04 | 4.28E-01 |
| rs1360136   | 9  | 22358389 | G | A | (-)       | 4.19E-06 | 0.61 | 0.38/0.50 | 0.75 | 0.99 | 0.49/0.49 | Y | 4.56E-05 | 1.81E-01 |
| rs12782324  | 10 | 6320019  | A | T | (-)       | 3.42E-06 | 2.11 | 0.19/0.10 | 0.92 | 0.91 | 0.13/0.14 | N | 1.73E-04 | 3.26E-01 |
| rs1871549   | 12 | 67044058 | T | C | GRIP1     | 3.02E-06 | 0.59 | 0.33/0.46 | 0.68 | 0.91 | 0.42/0.44 | Y | 2.82E-05 | 1.55E-01 |
| rs1904539   | 12 | 67045248 | A | G | GRIP1     | 3.98E-06 | 0.60 | 0.33/0.45 | 0.55 | 0.88 | 0.41/0.44 | Y | 2.25E-05 | 1.03E-01 |
| rs12827280  | 12 | 67045424 | T | C | GRIP1     | 4.40E-06 | 0.60 | 0.33/0.45 | 0.55 | 0.88 | 0.41/0.44 | Y | 2.43E-05 | 1.02E-01 |
| rs9600887   | 13 | 78006780 | T | C | (-)       | 3.06E-06 | 1.64 | 0.41/0.30 | 0.32 | 1.08 | 0.31/0.29 | Y | 7.35E-06 | 3.24E-02 |
| rs72722114  | 14 | 69752668 | A | C | GALNT16   | 9.21E-06 | 0.51 | 0.12/0.22 | 0.80 | 0.84 | 0.21/0.24 | Y | 1.42E-04 | 2.13E-01 |
| rs72722119  | 14 | 69752966 | A | G | GALNT16   | 5.00E-06 | 0.49 | 0.12/0.22 | 0.87 | 0.85 | 0.21/0.24 | Y | 1.11E-04 | 2.43E-01 |
| rs9920512   | 15 | 24112081 | C | A | (-)       | 6.64E-06 | 2.72 | 0.10/0.04 | 0.79 | 0.70 | 0.05/0.07 | Y | 9.21E-05 | 2.05E-01 |
| rs28373973  | 15 | 24118536 | A | G | (-)       | 5.42E-06 | 2.66 | 0.11/0.05 | 0.96 | 0.60 | 0.05/0.08 | N | 1.70E-04 | 3.04E-01 |
| rs111980424 | 16 | 66095254 | T | G | (-)       | 7.57E-06 | 2.25 | 0.13/0.06 | 0.10 | 1.56 | 0.11/0.08 | Y | 4.19E-06 | 1.22E-03 |

18  
19  
20  
21  
22

Table S3: Analysis results for the accommodative esotropia discovery and replication cohorts and their meta-analysis (results shown for SNPs with  $P \leq 1 \times 10^{-05}$  in the discovery cohort). SNPs rs10874098 and rs912759 had  $P < 0.05$  in the replication cohort. Abbreviations as follows: Chr, chromosome; OR, odds ratio; MAF, minor allele frequency; RE, random effect; Y, yes; N, no.

23 **Table S4: Meta-analysis results at rs2244352 and rs912759 in the non-accommodative and accommodative ET cohorts.**

24

|           | Non-accommodative ET |                  |                        |                       |       | Accommodative ET |                  |                        |                        |       |
|-----------|----------------------|------------------|------------------------|-----------------------|-------|------------------|------------------|------------------------|------------------------|-------|
|           | Fixed Effect OR      | Random Effect OR | Fixed Effect P-value   | Random Effect P-value | $I^2$ | Fixed Effect OR  | Random Effect OR | Fixed Effect P-value   | Random Effect P-value  | $I^2$ |
| rs2244352 | 1.33                 | 1.32             | $9.58 \times 10^{-11}$ | $1.09 \times 10^{-9}$ | 0.1   | 1.18             | 1.18             | 0.24                   | 0.24                   | 0     |
| rs912759  | 0.99                 | 0.99             | 0.82                   | 0.82                  | 0     | 0.59             | 0.59             | $1.89 \times 10^{-08}$ | $1.89 \times 10^{-08}$ | 0     |

25

26 Table S4: Fixed and random effect meta-analysis results at rs2244352 and rs912759 together with the heterogeneity estimate ( $I^2$ ). The  
 27 results are shown for the non-accommodative and accommodative ET cohorts independently. Abbreviations as follows: ET, esotropia; OR,  
 28 odds ratio.

29

30 **Table S5: Analysis results for the amblyopia and hyperopia subgroups discovery and replication cohorts and their meta-analysis.**

| A (Amblyopia) |            |           |                   |              |                     |                |                 |                     |       |                             |
|---------------|------------|-----------|-------------------|--------------|---------------------|----------------|-----------------|---------------------|-------|-----------------------------|
| Marker        | Chromosome | Position  | P-value discovery | OR discovery | P-value replication | OR replication | Overall P-Value | RE Analysis P-Value | $r^2$ | Risk allele in both cohorts |
| rs72922085    | 1          | 67261620  | 6.91E-07          | 1.63         | 0.29                | 1.61           | 4.15E-07        | 4.15E-07            | 0.00  | G                           |
| rs72671650    | 1          | 67265546  | 7.03E-06          | 1.60         | 0.24                | 1.66           | 3.40E-06        | 3.40E-06            | 0.00  | G                           |
| rs10910937    | 1          | 181397224 | 8.57E-07          | 1.71         | 0.12                | 1.51           | 2.31E-07        | 2.31E-07            | 0.00  | C                           |
| rs13434070    | 3          | 102424262 | 3.61E-06          | 1.75         | 0.19                | 1.60           | 1.39E-06        | 1.39E-06            | 0.00  | C                           |
| rs116450688   | 6          | 32716127  | 7.82E-06          | 1.84         | 0.04                | 2.01           | 8.57E-07        | 8.57E-07            | 0.00  | G                           |
| rs114299445   | 6          | 32719573  | 9.54E-06          | 1.83         | 0.06                | 1.94           | 1.39E-06        | 1.39E-06            | 0.00  | A                           |
| rs116931912   | 6          | 80846547  | 5.35E-06          | 3.35         | 0.21                | 2.68           | 2.46E-06        | 2.46E-06            | 0.00  | T                           |
| rs117563769   | 6          | 153541437 | 1.94E-06          | 1.89         | 0.48                | 0.74           | 1.84E-05        | 5.72E-01            | 0.80  | G                           |
| rs75627919    | 6          | 153544473 | 1.25E-06          | 1.89         | 0.42                | 0.72           | 1.50E-05        | 6.21E-01            | 0.82  | G                           |
| rs116211926   | 6          | 153546156 | 1.61E-06          | 1.88         | 0.53                | 0.78           | 1.35E-05        | 5.35E-01            | 0.78  | A                           |
| rs76180129    | 6          | 153546383 | 1.25E-06          | 1.89         | 0.42                | 0.72           | 1.50E-05        | 6.21E-01            | 0.82  | T                           |
| rs75896549    | 6          | 153550016 | 7.20E-06          | 1.94         | 0.65                | 0.80           | 4.58E-05        | 4.37E-01            | 0.74  | C                           |
| rs9479561     | 6          | 153550147 | 5.65E-06          | 1.83         | 0.57                | 1.29           | 7.31E-06        | 7.31E-06            | 0.00  | G                           |
| rs10965015    | 9          | 21473954  | 9.82E-06          | 1.37         | 0.94                | 0.97           | 2.28E-05        | 7.35E-02            | 0.42  | G                           |
| rs10965026    | 9          | 21485849  | 4.20E-06          | 1.42         | 0.76                | 0.98           | 7.62E-06        | 9.21E-03            | 0.26  | C                           |
| rs4978120     | 9          | 21486101  | 6.39E-06          | 1.41         | 0.70                | 1.00           | 9.98E-06        | 4.54E-04            | 0.10  | G                           |
| rs149407265   | 9          | 120745946 | 2.60E-06          | 2.66         | 0.53                | 1.31           | 4.00E-06        | 2.55E-03            | 0.26  | G                           |
| rs117507863   | 9          | 120747426 | 2.60E-06          | 2.66         | 0.53                | 1.31           | 4.00E-06        | 2.55E-03            | 0.26  | A                           |
| rs111486731   | 10         | 12482370  | 1.78E-06          | 2.68         | 0.71                | 1.11           | 5.49E-06        | 7.31E-02            | 0.59  | A                           |
| rs192756710   | 10         | 19209449  | 7.45E-07          | 3.24         | 0.76                | 1.37           | 1.55E-06        | 2.71E-02            | 0.40  | T                           |
| rs138421612   | 10         | 19213372  | 1.08E-06          | 3.16         | 0.76                | 1.37           | 2.16E-06        | 2.18E-02            | 0.36  | A                           |
| rs141331490   | 10         | 19216293  | 3.03E-06          | 3.05         | 0.59                | 1.60           | 3.73E-06        | 3.73E-06            | 0.00  | G                           |
| rs145426288   | 10         | 19219338  | 1.08E-06          | 3.17         | 0.76                | 1.37           | 2.16E-06        | 2.18E-02            | 0.36  | A                           |
| rs182698619   | 10         | 19223193  | 1.08E-06          | 3.17         | 0.76                | 1.37           | 2.16E-06        | 2.18E-02            | 0.36  | A                           |
| rs187902331   | 10         | 19223292  | 1.08E-06          | 3.17         | 0.76                | 1.37           | 2.16E-06        | 2.18E-02            | 0.36  | C                           |
| rs183317537   | 10         | 19226179  | 7.55E-07          | 3.21         | 0.76                | 1.37           | 1.51E-06        | 2.17E-02            | 0.37  | C                           |
| rs143658596   | 10         | 19226368  | 7.55E-07          | 3.21         | 0.76                | 1.37           | 1.51E-06        | 2.17E-02            | 0.37  | C                           |
| rs144479357   | 10         | 19237692  | 7.55E-07          | 3.20         | 0.76                | 1.37           | 1.51E-06        | 2.17E-02            | 0.37  | C                           |
| rs145822682   | 10         | 19242863  | 7.55E-07          | 3.20         | 0.76                | 1.37           | 1.51E-06        | 2.17E-02            | 0.37  | G                           |
| rs141412907   | 10         | 19243115  | 7.55E-07          | 3.20         | 0.76                | 1.37           | 1.51E-06        | 2.17E-02            | 0.37  | G                           |
| rs149020887   | 10         | 19246855  | 7.55E-07          | 3.20         | 0.76                | 1.37           | 1.51E-06        | 2.17E-02            | 0.37  | G                           |
| rs141211643   | 10         | 19247480  | 7.55E-07          | 3.20         | 0.76                | 1.37           | 1.51E-06        | 2.17E-02            | 0.37  | A                           |
| rs144292561   | 10         | 19248257  | 7.55E-07          | 3.20         | 0.76                | 1.37           | 1.51E-06        | 2.17E-02            | 0.37  | A                           |
| rs144777393   | 10         | 19252106  | 1.48E-06          | 3.13         | 0.76                | 1.37           | 2.81E-06        | 1.42E-02            | 0.31  | G                           |
| rs140364201   | 10         | 19253076  | 1.48E-06          | 3.13         | 0.76                | 1.37           | 2.81E-06        | 1.42E-02            | 0.31  | A                           |
| rs144481463   | 10         | 19256188  | 1.48E-06          | 3.13         | 0.35                | 2.03           | 1.13E-06        | 1.13E-06            | 0.00  | A                           |
| rs188992690   | 10         | 19262460  | 1.48E-06          | 3.13         | 0.35                | 2.03           | 1.13E-06        | 1.13E-06            | 0.00  | T                           |
| rs148951068   | 10         | 19262756  | 1.48E-06          | 3.13         | 0.35                | 2.03           | 1.13E-06        | 1.13E-06            | 0.00  | C                           |
| rs182167987   | 10         | 19278928  | 1.48E-06          | 3.13         | 0.35                | 2.03           | 1.13E-06        | 1.13E-06            | 0.00  | A                           |
| rs181048259   | 10         | 19279583  | 1.48E-06          | 3.13         | 0.35                | 2.03           | 1.13E-06        | 1.13E-06            | 0.00  | C                           |
| rs146205017   | 10         | 19288420  | 1.48E-06          | 3.13         | 0.35                | 2.03           | 1.13E-06        | 1.13E-06            | 0.00  | G                           |

|             |    |          |          |      |      |      |          |          |      |   |
|-------------|----|----------|----------|------|------|------|----------|----------|------|---|
| rs148021190 | 10 | 19321086 | 4.84E-07 | 3.26 | 0.35 | 2.03 | 3.78E-07 | 3.78E-07 | 0.00 | T |
| rs150579085 | 10 | 19321516 | 4.84E-07 | 3.26 | 0.35 | 2.03 | 3.78E-07 | 3.78E-07 | 0.00 | C |
| rs138508566 | 10 | 19323165 | 4.84E-07 | 3.26 | 0.35 | 2.03 | 3.78E-07 | 3.78E-07 | 0.00 | G |
| rs2422455   | 11 | 37051498 | 9.35E-06 | 1.41 | 0.12 | 0.61 | 1.82E-04 | 9.47E-01 | 0.88 | A |
| rs333772    | 11 | 37052785 | 7.53E-06 | 1.42 | 0.11 | 0.60 | 1.73E-04 | 9.61E-01 | 0.88 | A |
| rs2170311   | 15 | 78947611 | 8.15E-06 | 1.40 | 0.79 | 1.40 | 1.45E-05 | 6.83E-03 | 0.21 | A |
| rs61745888  | 16 | 57993841 | 3.57E-07 | 3.08 | 0.19 | 0.00 | 7.45E-06 | 8.44E-01 | 0.87 | T |
| rs76788887  | 16 | 57993947 | 1.60E-06 | 2.90 | 0.19 | 0.00 | 2.54E-05 | 8.66E-01 | 0.86 | C |
| rs7249863   | 19 | 23730717 | 4.01E-06 | 1.50 | 0.90 | 1.02 | 9.17E-06 | 5.99E-02 | 0.42 | C |
| rs2082472   | 19 | 23731649 | 3.83E-06 | 1.52 | 0.51 | 1.14 | 4.19E-06 | 4.19E-06 | 0.00 | G |
| rs8109004   | 19 | 23732005 | 3.83E-06 | 1.52 | 0.51 | 1.14 | 4.19E-06 | 4.19E-06 | 0.00 | A |
| rs12460990  | 19 | 23732710 | 8.61E-06 | 1.49 | 0.63 | 1.14 | 1.17E-05 | 1.17E-05 | 0.00 | C |
| rs62123400  | 19 | 23733723 | 8.61E-06 | 1.49 | 0.63 | 1.14 | 1.17E-05 | 1.17E-05 | 0.00 | A |
| rs62123401  | 19 | 23734886 | 8.61E-06 | 1.49 | 0.63 | 1.14 | 1.17E-05 | 1.17E-05 | 0.00 | C |
| rs55979338  | 19 | 23735096 | 7.18E-06 | 1.50 | 0.51 | 1.14 | 7.60E-06 | 7.60E-06 | 0.00 | C |
| rs62123403  | 19 | 23735277 | 5.65E-06 | 1.50 | 0.63 | 1.14 | 7.90E-06 | 7.90E-06 | 0.00 | A |
| rs12462785  | 19 | 23735482 | 9.40E-06 | 1.50 | 0.63 | 1.14 | 1.27E-05 | 1.27E-05 | 0.00 | C |
| rs12460521  | 19 | 23735678 | 7.86E-06 | 1.50 | 0.47 | 1.19 | 7.50E-06 | 7.50E-06 | 0.00 | T |
| rs2886002   | 19 | 23735974 | 8.61E-06 | 1.49 | 0.63 | 1.14 | 1.17E-05 | 1.17E-05 | 0.00 | T |
| rs12462246  | 19 | 23736660 | 8.34E-06 | 1.50 | 0.48 | 1.16 | 8.22E-06 | 8.22E-06 | 0.00 | A |
| rs12462767  | 19 | 23737368 | 6.96E-06 | 1.50 | 0.63 | 1.14 | 9.60E-06 | 9.60E-06 | 0.00 | C |
| rs12461367  | 19 | 23738428 | 6.96E-06 | 1.50 | 0.63 | 1.14 | 9.60E-06 | 9.60E-06 | 0.00 | C |
| rs2195961   | 19 | 23739585 | 6.96E-06 | 1.50 | 0.63 | 1.14 | 9.60E-06 | 9.60E-06 | 0.00 | T |
| rs62123405  | 19 | 23740586 | 5.09E-06 | 1.50 | 0.76 | 1.12 | 9.16E-06 | 8.20E-03 | 0.25 | T |
| rs59390831  | 19 | 23742761 | 4.40E-06 | 1.51 | 0.76 | 1.12 | 7.99E-06 | 9.22E-03 | 0.26 | G |
| rs2195960   | 19 | 23742841 | 4.82E-06 | 1.51 | 0.76 | 1.12 | 8.70E-06 | 8.59E-03 | 0.25 | A |
| rs2217662   | 19 | 23743106 | 4.82E-06 | 1.51 | 0.76 | 1.12 | 8.70E-06 | 8.59E-03 | 0.25 | T |
| rs62123408  | 19 | 23744120 | 8.51E-06 | 1.51 | 0.60 | 1.14 | 1.07E-05 | 1.07E-05 | 0.00 | G |
| rs17000239  | 19 | 23744563 | 4.82E-06 | 1.51 | 0.76 | 1.12 | 8.70E-06 | 8.59E-03 | 0.25 | A |
| rs35329492  | 19 | 23745170 | 4.82E-06 | 1.51 | 0.76 | 1.12 | 8.70E-06 | 8.59E-03 | 0.25 | A |
| rs12459046  | 19 | 23745485 | 4.82E-06 | 1.51 | 0.76 | 1.12 | 8.70E-06 | 8.59E-03 | 0.25 | A |
| rs10404666  | 19 | 23746292 | 5.85E-06 | 1.51 | 0.79 | 1.07 | 1.11E-05 | 1.55E-02 | 0.29 | C |
| rs2886003   | 19 | 23746456 | 8.53E-06 | 1.50 | 0.79 | 1.04 | 1.59E-05 | 1.23E-02 | 0.26 | A |
| rs10422879  | 19 | 23746781 | 5.85E-06 | 1.51 | 0.79 | 1.07 | 1.11E-05 | 1.55E-02 | 0.29 | A |
| rs10404713  | 19 | 23748279 | 5.17E-06 | 1.51 | 0.79 | 1.07 | 9.92E-06 | 1.67E-02 | 0.30 | G |
| rs8106780   | 19 | 23749345 | 9.09E-06 | 1.51 | 0.63 | 1.16 | 1.22E-05 | 1.22E-05 | 0.00 | G |
| rs59885226  | 19 | 23750703 | 7.69E-06 | 1.51 | 0.63 | 1.16 | 1.04E-05 | 1.04E-05 | 0.00 | G |
| rs62123411  | 19 | 23750818 | 5.17E-06 | 1.51 | 0.79 | 1.07 | 9.92E-06 | 1.67E-02 | 0.30 | T |
| rs62123412  | 19 | 23750930 | 5.17E-06 | 1.51 | 0.79 | 1.07 | 9.92E-06 | 1.67E-02 | 0.30 | A |
| rs10407300  | 19 | 23751950 | 9.09E-06 | 1.51 | 0.63 | 1.16 | 1.22E-05 | 1.22E-05 | 0.00 | T |
| rs4932863   | 19 | 23752320 | 5.17E-06 | 1.51 | 0.79 | 1.07 | 9.92E-06 | 1.67E-02 | 0.30 | T |
| rs4932864   | 19 | 23752621 | 9.09E-06 | 1.51 | 0.63 | 1.16 | 1.22E-05 | 1.22E-05 | 0.00 | A |
| rs4932865   | 19 | 23752627 | 5.17E-06 | 1.51 | 0.79 | 1.07 | 9.92E-06 | 1.67E-02 | 0.30 | T |
| rs10414987  | 19 | 23753052 | 9.09E-06 | 1.51 | 0.63 | 1.16 | 1.22E-05 | 1.22E-05 | 0.00 | G |
| rs28561078  | 19 | 23753402 | 5.17E-06 | 1.51 | 0.79 | 1.07 | 9.92E-06 | 1.67E-02 | 0.30 | G |
| rs4932867   | 19 | 23753792 | 5.17E-06 | 1.51 | 0.79 | 1.07 | 9.92E-06 | 1.67E-02 | 0.30 | T |
| rs4932868   | 19 | 23754021 | 5.17E-06 | 1.51 | 0.79 | 1.07 | 9.92E-06 | 1.67E-02 | 0.30 | C |
| rs8101304   | 19 | 23754371 | 5.65E-06 | 1.52 | 0.79 | 1.10 | 1.08E-05 | 1.59E-02 | 0.29 | C |

|            |    |          |          |      |      |      |          |          |      |   |
|------------|----|----------|----------|------|------|------|----------|----------|------|---|
| rs8100508  | 19 | 23754377 | 5.17E-06 | 1.51 | 0.79 | 1.07 | 9.92E-06 | 1.67E-02 | 0.30 | T |
| rs8100422  | 19 | 23754441 | 5.17E-06 | 1.51 | 0.79 | 1.07 | 9.92E-06 | 1.67E-02 | 0.30 | C |
| rs8100711  | 19 | 23754442 | 5.17E-06 | 1.51 | 0.79 | 1.07 | 9.92E-06 | 1.67E-02 | 0.30 | A |
| rs28801777 | 19 | 23754846 | 5.68E-06 | 1.52 | 0.79 | 1.10 | 1.08E-05 | 1.58E-02 | 0.29 | G |
| rs28784951 | 19 | 23754939 | 5.20E-06 | 1.51 | 0.79 | 1.07 | 9.97E-06 | 1.67E-02 | 0.30 | A |
| rs62123413 | 19 | 23755017 | 5.68E-06 | 1.52 | 0.79 | 1.10 | 1.08E-05 | 1.58E-02 | 0.29 | A |
| rs62123414 | 19 | 23755550 | 3.60E-06 | 1.52 | 0.79 | 1.07 | 7.11E-06 | 2.09E-02 | 0.33 | T |
| rs62123415 | 19 | 23755564 | 3.21E-06 | 1.52 | 0.79 | 1.07 | 6.38E-06 | 2.21E-02 | 0.33 | G |
| rs2116911  | 19 | 23756666 | 2.79E-06 | 1.52 | 0.79 | 1.10 | 5.62E-06 | 2.40E-02 | 0.35 | G |
| rs2116910  | 19 | 23756821 | 8.17E-06 | 1.50 | 0.66 | 1.13 | 1.17E-05 | 1.17E-05 | 0.00 | C |
| rs12459435 | 19 | 23757169 | 3.45E-06 | 1.52 | 0.79 | 1.07 | 6.85E-06 | 2.20E-02 | 0.33 | T |
| rs62123416 | 19 | 23757362 | 3.45E-06 | 1.52 | 0.79 | 1.07 | 6.85E-06 | 2.20E-02 | 0.33 | A |
| rs6511445  | 19 | 23757705 | 3.78E-06 | 1.53 | 0.79 | 1.10 | 7.46E-06 | 2.11E-02 | 0.33 | G |
| rs10418784 | 19 | 23758443 | 3.41E-06 | 1.53 | 0.79 | 1.10 | 6.78E-06 | 2.22E-02 | 0.33 | T |
| rs4932869  | 19 | 23759524 | 2.82E-06 | 1.52 | 0.79 | 1.07 | 5.68E-06 | 2.42E-02 | 0.35 | A |
| rs4932708  | 19 | 23759573 | 2.82E-06 | 1.52 | 0.79 | 1.07 | 5.68E-06 | 2.42E-02 | 0.35 | A |
| rs4932709  | 19 | 23759591 | 2.82E-06 | 1.52 | 0.79 | 1.07 | 5.68E-06 | 2.42E-02 | 0.35 | A |
| rs12461255 | 19 | 23759956 | 2.82E-06 | 1.52 | 0.79 | 1.07 | 5.68E-06 | 2.42E-02 | 0.35 | T |
| rs12461720 | 19 | 23760412 | 2.93E-06 | 1.53 | 0.63 | 1.16 | 4.21E-06 | 4.24E-05 | 0.05 | A |
| rs10415081 | 19 | 23761513 | 1.82E-06 | 1.54 | 0.72 | 1.08 | 3.20E-06 | 6.29E-03 | 0.26 | G |
| rs6054501  | 20 | 6718939  | 2.69E-06 | 1.74 | 0.36 | 0.62 | 2.17E-05 | 7.02E-01 | 0.80 | C |
| rs6038600  | 20 | 6722376  | 1.98E-06 | 1.76 | 0.20 | 0.49 | 2.51E-05 | 8.68E-01 | 0.85 | G |
| rs11908452 | 20 | 6723240  | 5.27E-07 | 1.80 | 0.18 | 0.51 | 8.34E-06 | 8.75E-01 | 0.86 | G |
| rs17804047 | 20 | 6726127  | 3.41E-07 | 1.80 | 0.18 | 0.51 | 5.65E-06 | 8.71E-01 | 0.86 | T |
| rs80168499 | 20 | 14421257 | 7.28E-06 | 3.04 | 0.31 | 0.61 | 6.49E-05 | 7.56E-01 | 0.81 | T |

**B (Hyperopia)**

| Marker      | Chromosome | Position  | P-value discovery | OR discovery | P-value replication | OR replication | Overall P-Value | RE Analysis P-Value | $r^2$ | Risk allele in both cohorts |
|-------------|------------|-----------|-------------------|--------------|---------------------|----------------|-----------------|---------------------|-------|-----------------------------|
| rs113877316 | 3          | 80129340  | 7.96E-06          | 2.57         | 0.34                | 0.64           | 8.63E-04        | 0.60                | 0.90  | A                           |
| rs1435382   | 4          | 37238386  | 5.22E-06          | 0.69         | 0.82                | 1.01           | 1.79E-04        | 0.36                | 0.85  | G                           |
| rs1023730   | 4          | 37240580  | 3.09E-06          | 0.66         | 0.92                | 1.01           | 9.38E-05        | 0.32                | 0.85  | T                           |
| rs1656197   | 4          | 37244135  | 3.95E-06          | 0.67         | 0.89                | 1.01           | 1.20E-04        | 0.33                | 0.85  | A                           |
| rs78011035  | 5          | 50177455  | 1.87E-06          | 2.47         | 0.25                | 1.52           | 2.50E-06        | 0.01                | 0.50  | A                           |
| rs10795300  | 10         | 986429    | 6.98E-06          | 1.60         | 0.02                | 0.67           | 1.08E-02        | 0.88                | 0.95  | G                           |
| rs11253524  | 10         | 986459    | 5.21E-06          | 1.60         | 0.03                | 0.68           | 8.64E-03        | 0.87                | 0.95  | T                           |
| rs11201870  | 10         | 87768614  | 9.21E-07          | 1.67         | 0.31                | 1.14           | 2.49E-06        | 0.03                | 0.68  | A                           |
| rs2352179   | 10         | 87790080  | 2.77E-06          | 1.67         | 0.02                | 1.41           | 1.62E-07        | 0.00                | 0.00  | T                           |
| rs1147601   | 10         | 90608238  | 6.29E-06          | 0.59         | 0.67                | 0.97           | 6.53E-05        | 0.16                | 0.79  | G                           |
| rs77403571  | 11         | 45913607  | 2.34E-06          | 2.30         | 0.49                | 0.81           | 3.84E-04        | 0.50                | 0.90  | A                           |
| rs10771886  | 12         | 32045777  | 4.52E-06          | 1.42         | 0.98                | 0.91           | 1.03E-04        | 0.28                | 0.84  | T                           |
| rs10771887  | 12         | 32045784  | 4.52E-06          | 1.42         | 0.98                | 0.91           | 1.03E-04        | 0.28                | 0.84  | T                           |
| rs4759700   | 12         | 130973555 | 7.97E-06          | 1.71         | 0.39                | 1.24           | 2.03E-05        | 0.04                | 0.62  | T                           |
| rs9560962   | 13         | 92836123  | 7.79E-06          | 0.57         | 0.23                | 0.84           | 9.75E-06        | 0.01                | 0.49  | T                           |
| rs74064178  | 14         | 82929718  | 2.38E-06          | 2.77         | 0.50                | 0.73           | 3.44E-04        | 0.49                | 0.90  | A                           |
| rs1237957   | 16         | 10096870  | 7.66E-06          | 1.71         | 0.71                | 1.08           | 8.44E-05        | 0.17                | 0.79  | C                           |
| rs3104709   | 16         | 10097944  | 7.66E-06          | 1.71         | 0.71                | 1.08           | 8.29E-05        | 0.17                | 0.79  | T                           |
| rs863283    | 16         | 10103435  | 7.09E-06          | 1.70         | 0.75                | 1.07           | 9.34E-05        | 0.19                | 0.80  | A                           |

|            |    |          |          |      |      |      |          |      |      |   |
|------------|----|----------|----------|------|------|------|----------|------|------|---|
| rs837690   | 16 | 10103724 | 6.40E-06 | 1.70 | 0.67 | 1.09 | 6.61E-05 | 0.16 | 0.79 | A |
| rs865101   | 16 | 10104243 | 8.31E-06 | 1.67 | 0.94 | 1.05 | 1.75E-04 | 0.26 | 0.83 | C |
| rs3104710  | 16 | 10104257 | 8.31E-06 | 1.67 | 0.94 | 1.05 | 1.75E-04 | 0.26 | 0.83 | T |
| rs837691   | 16 | 10105143 | 8.31E-06 | 1.67 | 0.94 | 1.04 | 1.75E-04 | 0.26 | 0.83 | G |
| rs1448273  | 16 | 10146237 | 5.31E-06 | 1.69 | 0.97 | 1.00 | 1.76E-04 | 0.30 | 0.85 | T |
| rs79262004 | 16 | 10162462 | 6.13E-06 | 1.68 | 0.90 | 0.95 | 2.20E-04 | 0.33 | 0.86 | T |
| rs61366236 | 18 | 33315471 | 7.79E-06 | 2.86 | 0.33 | 0.58 | 1.15E-03 | 0.60 | 0.90 | T |
| rs10153386 | 18 | 68615592 | 8.93E-06 | 2.01 | 0.17 | 1.37 | 7.67E-06 | 0.00 | 0.42 | G |
| rs429358   | 19 | 45411941 | 7.16E-07 | 1.77 | 0.03 | 1.46 | 1.00E-07 | 0.00 | 0.06 | C |
| rs6049216  | 20 | 2442273  | 6.28E-06 | 0.54 | 0.82 | 1.05 | 2.30E-04 | 0.36 | 0.86 | C |
| rs11908452 | 20 | 6723240  | 5.39E-06 | 1.77 | 0.43 | 0.84 | 3.78E-04 | 0.55 | 0.89 | G |
| rs17804047 | 20 | 6726127  | 6.56E-06 | 1.76 | 0.45 | 0.84 | 3.90E-04 | 0.54 | 0.88 | T |
| rs11910551 | 21 | 43213700 | 9.62E-06 | 3.02 | 0.05 | 0.70 | 2.25E-03 | 0.92 | 0.93 | T |
| rs73373447 | 21 | 43215744 | 7.79E-06 | 3.12 | 0.05 | 0.70 | 2.06E-03 | 0.91 | 0.93 | C |

31  
32  
33  
34

Table S5: Analysis results for the amblyopia and hyperopia subgroups discovery and replication cohorts and their meta-analysis (Results shown for SNPs with  $P \leq 1 \times 10^{-05}$  in the discovery cohort). Abbreviations as follows: OR, Odds ratio; RE, random effect.

35 **Table S6: SNPs in high linkage disequilibrium (LD) with rs2244352.**

| Marker     | Gene   | Chromosome: position | Alleles | MAF  | Distance | D'   | R <sup>2</sup> | P-value  | RegulomeDB score |
|------------|--------|----------------------|---------|------|----------|------|----------------|----------|------------------|
| rs2244352  | WRB    | 21:40757973          | T/G     | 0.32 | 0        | 1    | 1              | 2.84E-09 | 1b               |
| rs3787924  | WRB    | 21:40761307          | A/G     | 0.31 | 3334     | 1    | 0.71           | 1.50E-05 | 7                |
| rs6517547  | WRB    | 21:40755994          | T/C     | 0.29 | -1979    | 1    | 0.74           | 2.07E-05 | 7                |
| rs2837006  | WRB    | 21:40772436          | T/C     | 0.31 | 14463    | 0.95 | 0.7            | 1.07E-05 | 1f               |
| rs2837001  | WRB    | 21:40763895          | T/C     | 0.31 | 5922     | 0.95 | 0.7            | 1.11E-05 | 5                |
| rs2837005  | WRB    | 21:40769807          | T/C     | 0.31 | 11834    | 0.95 | 0.7            | 1.16E-05 | 5                |
| rs8131718  | WRB    | 21:40766181          | G/T     | 0.31 | 8208     | 0.95 | 0.7            | 1.40E-05 | 7                |
| rs1060180  | WRB    | 21:40769017          | G/T     | 0.31 | 11044    | 0.95 | 0.7            | 1.40E-05 | 7                |
| rs13230    | WRB    | 21:40769290          | A/G     | 0.31 | 11317    | 0.95 | 0.7            | 1.40E-05 | 5                |
| rs9974828  | WRB    | 21:40772045          | C/T     | 0.31 | 14072    | 0.95 | 0.7            | 1.53E-05 | 7                |
| rs2837000  | WRB    | 21:40762255          | G/A     | 0.31 | 4282     | 0.95 | 0.7            | 1.64E-05 | 5                |
| rs2836999  | WRB    | 21:40761545          | T/G     | 0.31 | 3572     | 0.95 | 0.7            | 1.71E-05 | 1f               |
| rs3787923  | WRB    | 21:40761056          | G/C     | 0.31 | 3083     | 0.95 | 0.7            | 2.01E-05 | 7                |
| rs7277602  | SH3BGR | 21:40828145          | C/G     | 0.48 | 70172    | 0.95 | 0.54           | 3.18E-05 | 7                |
| rs10775662 | WRB    | 21:40756675          | G/A     | 0.29 | -1298    | 0.95 | 0.7            | 3.40E-05 | 4                |
| rs2837007  | WRB    | 21:40772484          | C/T     | 0.31 | 14511    | 0.95 | 0.7            | 3.80E-05 | 1f               |
| rs2837008  | WRB    | 21:40773487          | C/T     | 0.31 | 15514    | 0.95 | 0.7            | 4.20E-05 | 7                |
| rs13051142 | LCA5L  | 21:40817430          | G/A     | 0.48 | 59457    | 0.95 | 0.52           | 4.75E-05 | 2b               |
| rs13050837 | LCA5L  | 21:40817356          | C/T     | 0.48 | 59383    | 0.95 | 0.54           | 5.33E-05 | 4                |
| rs9983100  | LCA5L  | 21:40808508          | C/T     | 0.48 | 50535    | 0.95 | 0.54           | 5.65E-05 | 7                |
| rs4816626  | LCA5L  | 21:40809364          | C/T     | 0.48 | 51391    | 0.95 | 0.54           | 5.68E-05 | 7                |
| rs9983404  | LCA5L  | 21:40817127          | G/C     | 0.48 | 59154    | 0.95 | 0.54           | 5.65E-05 | 2b               |
| rs9983435  | LCA5L  | 21:40816631          | T/C     | 0.48 | 58658    | 0.95 | 0.5            | 5.33E-05 | 1f               |
| rs9305674  | WRB    | 21:40764049          | G/A     | 0.31 | 6076     | 0.9  | 0.66           | 1.64E-05 | 5                |
| rs13051949 | WRB    | 21:40760605          | A/T     | 0.31 | 2632     | 0.9  | 0.66           | 3.01E-05 | 4                |
| rs2837002  | WRB    | 21:40763986          | T/G     | 0.31 | 6013     | 0.9  | 0.66           | 3.41E-05 | 5                |
| rs9983180  | LCA5L  | 21:40817071          | C/A     | 0.48 | 59098    | 0.9  | 0.54           | 5.33E-05 | 1f               |
| rs9983716  | LCA5L  | 21:40816940          | T/C     | 0.48 | 58967    | 0.9  | 0.5            | 5.33E-05 | 5                |
| rs13051054 | LCA5L  | 21:40817507          | C/A     | 0.48 | 59534    | 0.85 | 0.48           | 4.84E-05 | 4                |
| rs8131355  | SH3BGR | 21:40867016          | G/A     | 0.47 | 109043   | 0.82 | 0.34           | 4.38E-05 | 6                |
| rs2837051  | SH3BGR | 21:40869246          | G/A     | 0.47 | 111273   | 0.82 | 0.34           | 5.16E-05 | 7                |
| rs8126729  | SH3BGR | 21:40867559          | C/T     | 0.47 | 109586   | 0.82 | 0.34           | 6.23E-05 | 7                |
| rs2009713  | SH3BGR | 21:40866086          | C/T     | 0.5  | 108113   | 0.82 | 0.33           | 1.23E-05 | 6                |
| rs2837043  | SH3BGR | 21:40851556          | T/G     | 0.48 | 93583    | 0.76 | 0.31           | 3.36E-06 | 5                |

36  
37 Table S6: SNPs in high linkage disequilibrium (LD) with rs2244352, the significant SNP resulting from the association test of the non-  
38 accommodative esotropia discovery cohort. LD calculated using SNAP: SNP Annotation and Proxy Search tool version 2.2. Regulome DB<sup>6</sup>  
39 scores are assigned to variants based on the number of datatypes supporting its functionality; smaller scores indicate more evidence.  
40 Abbreviations are as follows: MAF, minor allele frequency; DB: database.



41 **Table S7: Single Tissue eQTL analysis for rs2244352**

| Gene   | P-Value  | Effect Size | Tissue                                |
|--------|----------|-------------|---------------------------------------|
| WRB    | 8.60E-34 | -0.63       | Artery - Tibial                       |
| WRB    | 1.40E-31 | -0.65       | Adipose - Subcutaneous                |
| LCA5L  | 9.90E-29 | -0.82       | Nerve - Tibial                        |
| WRB    | 3.80E-28 | -0.4        | Nerve - Tibial                        |
| LCA5L  | 1.40E-27 | -0.79       | Esophagus - Muscularis                |
| LCA5L  | 2.90E-27 | -0.75       | Skin - Sun Exposed (Lower leg)        |
| LCA5L  | 1.10E-26 | -0.76       | Skin - Not Sun Exposed (Suprapubic)   |
| WRB    | 5.70E-26 | -0.56       | Cells - Transformed fibroblasts       |
| LCA5L  | 6.40E-26 | -0.61       | Thyroid                               |
| WRB    | 3.00E-24 | -0.53       | Skin - Sun Exposed (Lower leg)        |
| WRB    | 3.20E-24 | -0.49       | Esophagus - Mucosa                    |
| WRB    | 5.20E-23 | -0.32       | Lung                                  |
| WRB    | 1.50E-22 | -0.37       | Esophagus - Muscularis                |
| WRB    | 9.90E-22 | -0.54       | Adipose - Visceral (Omentum)          |
| LCA5L  | 4.10E-21 | -0.79       | Artery - Aorta                        |
| WRB    | 7.90E-20 | -0.58       | Breast - Mammary Tissue               |
| LCA5L  | 1.60E-18 | -0.64       | Esophagus - Mucosa                    |
| WRB    | 3.70E-18 | -0.34       | Thyroid                               |
| WRB    | 5.60E-18 | -0.42       | Skin - Not Sun Exposed (Suprapubic)   |
| LCA5L  | 1.20E-16 | -0.73       | Heart - Left Ventricle                |
| LCA5L  | 1.20E-16 | -0.43       | Muscle - Skeletal                     |
| LCA5L  | 2.40E-16 | -0.6        | Artery - Tibial                       |
| LCA5L  | 4.60E-16 | -1          | Brain - Cerebellar Hemisphere         |
| LCA5L  | 8.20E-16 | -0.64       | Adipose - Subcutaneous                |
| LCA5L  | 1.00E-15 | -0.65       | Stomach                               |
| LCA5L  | 1.70E-15 | -0.69       | Pancreas                              |
| LCA5L  | 3.40E-15 | -0.83       | Colon - Sigmoid                       |
| LCA5L  | 8.20E-15 | -0.69       | Heart - Atrial Appendage              |
| WRB    | 3.00E-14 | -0.53       | Colon - Sigmoid                       |
| LCA5L  | 4.00E-14 | -0.39       | Cells - Transformed fibroblasts       |
| WRB    | 4.40E-14 | -0.41       | Artery - Aorta                        |
| LCA5L  | 7.20E-14 | -0.66       | Esophagus - Gastroesophageal Junction |
| WRB    | 1.10E-13 | -0.24       | Whole Blood                           |
| LCA5L  | 1.60E-13 | -0.32       | Lung                                  |
| LCA5L  | 2.10E-13 | -0.53       | Adipose - Visceral (Omentum)          |
| LCA5L  | 2.70E-13 | -0.52       | Breast - Mammary Tissue               |
| WRB    | 8.70E-13 | -0.46       | Esophagus - Gastroesophageal Junction |
| WRB    | 4.20E-12 | -0.56       | Artery - Coronary                     |
| SH3BGR | 2.50E-11 | -0.35       | Skin - Sun Exposed (Lower leg)        |
| LCA5L  | 4.60E-11 | -0.95       | Brain - Cerebellum                    |
| WRB    | 4.80E-11 | -0.58       | Ovary                                 |
| SH3BGR | 1.60E-10 | -0.57       | Pancreas                              |
| LCA5L  | 2.00E-10 | -0.79       | Spleen                                |
| SH3BGR | 4.00E-10 | -0.32       | Nerve - Tibial                        |
| LCA5L  | 7.50E-10 | -0.81       | Brain - Cortex                        |

|        |          |       |                                           |
|--------|----------|-------|-------------------------------------------|
| LCA5L  | 8.30E-10 | -0.65 | Pituitary                                 |
| LCA5L  | 1.10E-09 | -0.86 | Vagina                                    |
| SH3BGR | 1.40E-09 | -0.28 | Thyroid                                   |
| LCA5L  | 4.90E-09 | -0.43 | Whole Blood                               |
| LCA5L  | 6.30E-09 | -0.47 | Adrenal Gland                             |
| LCA5L  | 6.40E-09 | -0.7  | Artery - Coronary                         |
| LCA5L  | 9.30E-09 | -0.63 | Brain - Nucleus accumbens (basal ganglia) |
| LCA5L  | 2.20E-08 | -0.52 | Brain - Hippocampus                       |
| LCA5L  | 3.10E-08 | -0.73 | Ovary                                     |
| LCA5L  | 3.20E-08 | -0.81 | Brain - Frontal Cortex (BA9)              |
| LCA5L  | 9.20E-08 | -0.77 | Uterus                                    |
| LCA5L  | 1.50E-07 | -0.58 | Small Intestine - Terminal Ileum          |
| LCA5L  | 2.10E-07 | -0.65 | Prostate                                  |
| LCA5L  | 3.80E-07 | -0.46 | Brain - Caudate (basal ganglia)           |
| LCA5L  | 4.20E-07 | -0.75 | Brain - Anterior cingulate cortex (BA24)  |
| WRB    | 4.50E-07 | -0.64 | Uterus                                    |
| WRB    | 4.80E-07 | -0.41 | Vagina                                    |
| WRB    | 6.60E-07 | 0.45  | Brain - Cerebellar Hemisphere             |
| SH3BGR | 1.10E-06 | -0.28 | Skin - Not Sun Exposed (Suprapubic)       |
| LCA5L  | 1.40E-06 | -0.72 | Brain - Putamen (basal ganglia)           |
| WRB    | 2.10E-06 | -0.43 | Spleen                                    |
| WRB    | 2.70E-06 | -0.22 | Stomach                                   |
| SH3BGR | 3.60E-06 | -0.38 | Colon - Sigmoid                           |
| SH3BGR | 4.20E-06 | -0.26 | Adipose - Visceral (Omentum)              |
| SH3BGR | 8.20E-06 | -0.25 | Adipose - Subcutaneous                    |
| WRB    | 1.20E-05 | -0.29 | Prostate                                  |
| WRB    | 1.70E-05 | -0.4  | Brain - Spinal cord (cervical c-1)        |
| WRB    | 3.40E-05 | -0.31 | Pancreas                                  |
| LCA5L  | 5.10E-05 | -0.49 | Minor Salivary Gland                      |
| SH3BGR | 1.40E-04 | -0.34 | Adrenal Gland                             |
| LCA5L  | 1.80E-04 | -0.42 | Brain - Hypothalamus                      |
| SH3BGR | 2.00E-04 | -0.18 | Artery - Tibial                           |
| SH3BGR | 2.00E-04 | -0.22 | Esophagus - Muscularis                    |
| WRB    | 2.20E-04 | -0.42 | Brain - Substantia nigra                  |
| SH3BGR | 2.30E-04 | -0.18 | Stomach                                   |
| SH3BGR | 2.60E-04 | -0.37 | Brain - Nucleus accumbens (basal ganglia) |
| WRB    | 3.50E-04 | -0.43 | Minor Salivary Gland                      |
| SH3BGR | 3.80E-04 | -0.19 | Artery - Aorta                            |
| SH3BGR | 3.80E-04 | -0.2  | Lung                                      |
| PSMG1  | 1.10E-03 | -0.14 | Whole Blood                               |
| LCA5L  | 1.20E-03 | -0.49 | Brain - Substantia nigra                  |
| WRB    | 1.50E-03 | -0.27 | Brain - Cortex                            |
| WRB    | 1.60E-03 | -0.27 | Brain - Caudate (basal ganglia)           |
| WRB    | 2.50E-03 | -0.15 | Heart - Atrial Appendage                  |
| SH3BGR | 2.90E-03 | -0.21 | Breast - Mammary Tissue                   |
| LCA5L  | 3.40E-03 | -0.41 | Cells - EBV-transformed lymphocytes       |
| SH3BGR | 3.40E-03 | -0.16 | Cells - Transformed fibroblasts           |
| LCA5L  | 3.50E-03 | -0.58 | Brain - Spinal cord (cervical c-1)        |

|        |          |       |                                           |
|--------|----------|-------|-------------------------------------------|
| WRB    | 3.50E-03 | -0.28 | Brain - Putamen (basal ganglia)           |
| HMG1   | 3.60E-03 | -0.08 | Whole Blood                               |
| WRB    | 4.20E-03 | -0.19 | Small Intestine - Terminal Ileum          |
| LCA5L  | 5.10E-03 | 0.059 | Testis                                    |
| WRB    | 5.70E-03 | -0.3  | Cells - EBV-transformed lymphocytes       |
| LCA5L  | 6.30E-03 | -0.28 | Liver                                     |
| SH3BGR | 6.50E-03 | -0.3  | Uterus                                    |
| PSMG1  | 7.60E-03 | 0.24  | Brain - Nucleus accumbens (basal ganglia) |
| WRB    | 8.70E-03 | -0.26 | Brain - Hippocampus                       |
| SH3BGR | 9.50E-03 | -0.2  | Vagina                                    |
| WRB    | 9.60E-03 | 0.26  | Brain - Frontal Cortex (BA9)              |
| PSMG1  | 9.90E-03 | 0.19  | Brain - Cortex                            |
| PSMG1  | 1.10E-02 | 0.14  | Esophagus - Gastroesophageal Junction     |
| SH3BGR | 1.40E-02 | -0.29 | Brain - Hippocampus                       |
| PSMG1  | 1.40E-02 | 0.09  | Esophagus - Muscularis                    |
| SH3BGR | 1.60E-02 | -0.25 | Pituitary                                 |
| HMG1   | 1.60E-02 | 0.2   | Brain - Caudate (basal ganglia)           |
| PSMG1  | 1.80E-02 | 0.2   | Brain - Cerebellum                        |
| SH3BGR | 2.20E-02 | -0.08 | Muscle - Skeletal                         |
| HMG1   | 2.30E-02 | 0.13  | Cells - EBV-transformed lymphocytes       |
| SH3BGR | 2.40E-02 | -0.24 | Brain - Hypothalamus                      |
| WRB    | 2.50E-02 | -0.11 | Adrenal Gland                             |
| PSMG1  | 2.90E-02 | 0.25  | Brain - Putamen (basal ganglia)           |
| BRWD1  | 3.10E-02 | -0.06 | Cells - Transformed fibroblasts           |
| WRB    | 3.30E-02 | -0.14 | Pituitary                                 |
| SH3BGR | 3.40E-02 | -0.26 | Brain - Putamen (basal ganglia)           |
| PSMG1  | 3.40E-02 | 0.07  | Muscle - Skeletal                         |
| PSMG1  | 4.50E-02 | -0.06 | Thyroid                                   |
| BRWD1  | 4.70E-02 | 0.06  | Muscle - Skeletal                         |
| PSMG1  | 4.90E-02 | 0.14  | Brain - Frontal Cortex (BA9)              |
| BRWD1  | 4.90E-02 | 0.06  | Esophagus - Muscularis                    |
| BRWD1  | 5.00E-02 | 0.08  | Esophagus - Gastroesophageal Junction     |

42

43

44

45

46

Table S7: Single Tissue eQTL analysis for rs2244352. Only genes that were sufficiently expressed or with associations < 0.05 based on GTEx analysis release V7 (<http://gtexportal.org/>) are reported. Note that the risk allele of rs2244352 in the GWAS study is the reference allele [T]. Abbreviations as follows: BA9, Brodmann area 9; BA24, Brodmann area 24.

47 **Table S8: Effect sizes for Single Tissue eQTL analysis of rs2244352 in different brain subregions.**

| Brain region                      | Gene  |       |        |      |       |
|-----------------------------------|-------|-------|--------|------|-------|
|                                   | WRB   | LCA5L | SH3BGR | HMG1 | PSMG1 |
| Cortex                            | -0.27 | -0.81 | (-)    | (-)  | 0.19  |
| Caudate (basal ganglia)           | -0.27 | -0.46 | (-)    | 0.2  | (-)   |
| Nucleus accumbens (basal ganglia) | (-)   | -0.63 | -0.37  | (-)  | 0.24  |
| Putamen (basal ganglia)           | -0.28 | -0.72 | -0.26  | (-)  | 0.25  |
| Hippocampus                       | -0.26 | -0.52 | -0.29  | (-)  | (-)   |
| Cerebellar Hemisphere             | 0.45  | -1.00 | (-)    | (-)  | (-)   |
| Cerebellum                        | (-)   | -0.95 | (-)    | (-)  | 0.2   |
| Frontal Cortex (BA9)              | 0.26  | -0.81 | (-)    | (-)  | 0.14  |
| Amygdala                          | (-)   | (-)   | (-)    | (-)  | (-)   |
| Anterior cingulate cortex (BA24)  | (-)   | -0.75 | (-)    | (-)  | (-)   |
| Hypothalamus                      | (-)   | -0.42 | -0.24  | (-)  | (-)   |
| Spinal cord (cervical c-1)        | -0.4  | -0.58 | (-)    | (-)  | (-)   |
| Substantia nigra                  | -0.42 | -0.49 | (-)    | (-)  | (-)   |

48  
49 Table S8: Effect sizes for Single Tissue eQTL analysis of rs2244352 in different brain regions (only reported for those with  $P < 0.05$ ). Note  
50 that the risk allele of rs2244352 in the GWAS study is the reference allele [T]. Data based on GTEx analysis release V7  
51 (<http://gtexportal.org/>). Abbreviations are as follows: BA9, Brodmann area 9; BA24, Brodmann area 24.

52  
53  
54  
55

**Table S9: Expression and function of the genes within the topologically associating domain (TAD) that includes rs2244352.**

| Gene                      | Expression    |                                                         | Spatial                                                   | Function                                                                                                    | Effect of rs2244352 [T] on expression |
|---------------------------|---------------|---------------------------------------------------------|-----------------------------------------------------------|-------------------------------------------------------------------------------------------------------------|---------------------------------------|
|                           | Fetal Tissues | Adult Tissues                                           |                                                           |                                                                                                             |                                       |
| WRB <sup>7-10</sup>       | Yes           | Yes                                                     | High in brain, heart, liver, skeletal muscle and pancreas | Post-translational TRC40-mediated insertion of tail-anchored proteins into the ER membrane                  | Increase                              |
| LCA5L <sup>11</sup>       | NA            | Yes                                                     | High in testis, lung, retina, heart and brain             | Localizes to motile cilia and/or flagella, potentially involved in ciliopathies                             | Increase                              |
| SH3BGR <sup>7,12-14</sup> | Yes           | Yes                                                     | High in CNS, heart, sarcomere and visceral organs         | Not characterized                                                                                           | Increase                              |
| HMG1 <sup>15-19</sup>     | Yes           | Restricted to cells committed to active differentiation | Ubiquitous                                                | Member of HMG1 family. Modulators of cellular differentiation and enhance the ability to repair damaged DNA | Increase/decrease                     |
| BRWD1 <sup>7,20,21</sup>  | Yes           | Yes                                                     | High in brain, kidney, testes, pancreas, and muscle       | Transcriptional regulator involved in chromatin remodeling complexes                                        | Increase                              |

|                          |     |     |                                                                            |                                         |          |
|--------------------------|-----|-----|----------------------------------------------------------------------------|-----------------------------------------|----------|
| PSMG1 <sup>7,22,23</sup> | Yes | yes | High in testis, kidney, liver, brain, heart, skeletal muscle, and pancreas | Possible function in cell proliferation | Decrease |
|--------------------------|-----|-----|----------------------------------------------------------------------------|-----------------------------------------|----------|

56

57 Table S9: Expression and function of the genes within the topologically associating domain (TAD) where the significant SNP rs2244352  
58 resides. The risk allele in the GWAS which is also the reference allele [T] of rs2244352 was found to be associated with increased  
59 expression of most of the genes except *HMGN1* where it exerted effect in both directions and *PSMG1* where it decreased the expression;  
60 data based on GTEx analysis release V7 (<http://gtexportal.org/>).  
61

## 62 References

- 63 1. Purcell S, Neale B, Todd-Brown K, et al. PLINK: a tool set for whole-genome association  
64 and population-based linkage analyses. *Am J Hum Genet* 2007;81:559-575.
- 65 2. Price AL, Patterson NJ, Plenge RM, Weinblatt ME, Shadick NA, Reich D. Principal  
66 components analysis corrects for stratification in genome-wide association studies. *Nat Genet*  
67 2006;38:904-909.
- 68 3. Delaneau O, Marchini J, Zagury JF. A linear complexity phasing method for thousands  
69 of genomes. *Nat Methods* 2011;9:179-181.
- 70 4. O'Connell J, Gurdasani D, Delaneau O, et al. A general approach for haplotype phasing  
71 across the full spectrum of relatedness. *PLoS Genet* 2014;10:e1004234.
- 72 5. Howie BN, Donnelly P, Marchini J. A flexible and accurate genotype imputation method  
73 for the next generation of genome-wide association studies. *PLoS Genet* 2009;5:e1000529.
- 74 6. Boyle AP, Hong EL, Hariharan M, et al. Annotation of functional variation in personal  
75 genomes using RegulomeDB. *Genome Res* 2012;22:1790-1797.
- 76 7. Carithers LJ, Moore HM. The Genotype-Tissue Expression (GTEx) Project. *Biopreserv*  
77 *Biobank* 2015;13:307-308.
- 78 8. Egeo A, Mazzocco M, Sotgia F, et al. Identification and characterization of a new human  
79 cDNA from chromosome 21q22.3 encoding a basic nuclear protein. *Hum Genet* 1998;102:289-  
80 293.
- 81 9. Vilardi F, Stephan M, Clancy A, Janshoff A, Schwappach B. WRB and CAML are  
82 necessary and sufficient to mediate tail-anchored protein targeting to the ER membrane. *Plos*  
83 *One* 2014;9:e85033.
- 84 10. Vilardi F, Lorenz H, Dobberstein B. WRB is the receptor for TRC40/Asna1-mediated  
85 insertion of tail-anchored proteins into the ER membrane. *J Cell Sci* 2011;124:1301-1307.
- 86 11. Mans DA CK, Boldt K , Lamers IJC , Reeuwijk JV , Loges NT , Bolat E , Franke L ,  
87 Hetterschijt L , Letteboer SJF , Peters TA, Omran H , Cremers FPM , Ueffing M, Roepman R.

- 88 The lebercilin-like protein is embedded in a ciliary protein network and is preferentially  
89 expressed in motile cilia. In: Beales PL MH (ed), *First International Cilia in Development and*  
90 *Disease*. London, UK; 2012:93.
- 91 12. Tong F, Zhang M, Guo X, et al. Expression patterns of SH3BGR family members in  
92 zebrafish development. *Dev Genes Evol* 2016;226:287-295.
- 93 13. Egeo A, Di Lisi R, Sandri C, et al. Developmental expression of the SH3BGR gene,  
94 mapping to the Down syndrome heart critical region. *Mech Dev* 2000;90:313-316.
- 95 14. Scartezzini P, Egeo A, Colella S, et al. Cloning a new human gene from chromosome  
96 21q22.3 encoding a glutamic acid-rich protein expressed in heart and skeletal muscle. *Hum*  
97 *Genet* 1997;99:387-392.
- 98 15. Trieschmann L, Alfonso PJ, Crippa MP, Wolffe AP, Bustin M. Incorporation of  
99 chromosomal proteins HMG-14/HMG-17 into nascent nucleosomes induces an extended  
100 chromatin conformation and enhances the utilization of active transcription complexes. *EMBO J*  
101 1995;14:1478-1489.
- 102 16. Zhu N, Hansen U. Transcriptional regulation by HMGN proteins. *Biochim Biophys Acta*  
103 2010;1799:74-79.
- 104 17. Hock R, Furusawa T, Ueda T, Bustin M. HMG chromosomal proteins in development  
105 and disease. *Trends Cell Biol* 2007;17:72-79.
- 106 18. Furusawa T, Lim JH, Catez F, Birger Y, Mackem S, Bustin M. Down-regulation of  
107 nucleosomal binding protein HMGN1 expression during embryogenesis modulates Sox9  
108 expression in chondrocytes. *Mol Cell Biol* 2006;26:592-604.
- 109 19. Korner U, Bustin M, Scheer U, Hock R. Developmental role of HMGN proteins in  
110 *Xenopus laevis*. *Mech Dev* 2003;120:1177-1192.
- 111 20. Ramos VC, Vidal-Taboada J, Bergonon S, et al. Characterisation and expression  
112 analysis of the WDR9 gene, located in the Down critical region-2 of the human chromosome 21.  
113 *Biochim Biophys Acta* 2002;1577:377-383.
- 114 21. Huang H, Rambaldi I, Daniels E, Featherstone M. Expression of the Wdr9 gene and

115 protein products during mouse development. *Dev Dyn* 2003;227:608-614.

116 22. Vidal-Taboada JM, Lu A, Pique M, Pons G, Gil J, Oliva R. Down syndrome critical region  
117 gene 2: Expression during mouse development and in human cell lines indicates a function  
118 related to cell proliferation. *Biochem Bioph Res Co* 2000;272:156-163.

119 23. Mao R, Zielke CL, Zielke HR, Pevsner J. Global up-regulation of chromosome 21 gene  
120 expression in the developing Down syndrome brain. *Genomics* 2003;81:457-467.

121
