# Supplementary figures and images for: Genome-Wide Association Study Identifies a Susceptibility Locus for Comitant Esotropia and Suggests a Parent-of-Origin Effect
Source: PubMed Central journal article supplement — Invest Ophthalmol Vis Sci. 2018 Aug;59(10):4054–64. doi: 10.1167/iovs.18-24082 (PMC6088800; doi:10.1167/iovs.18-24082), 2018-08

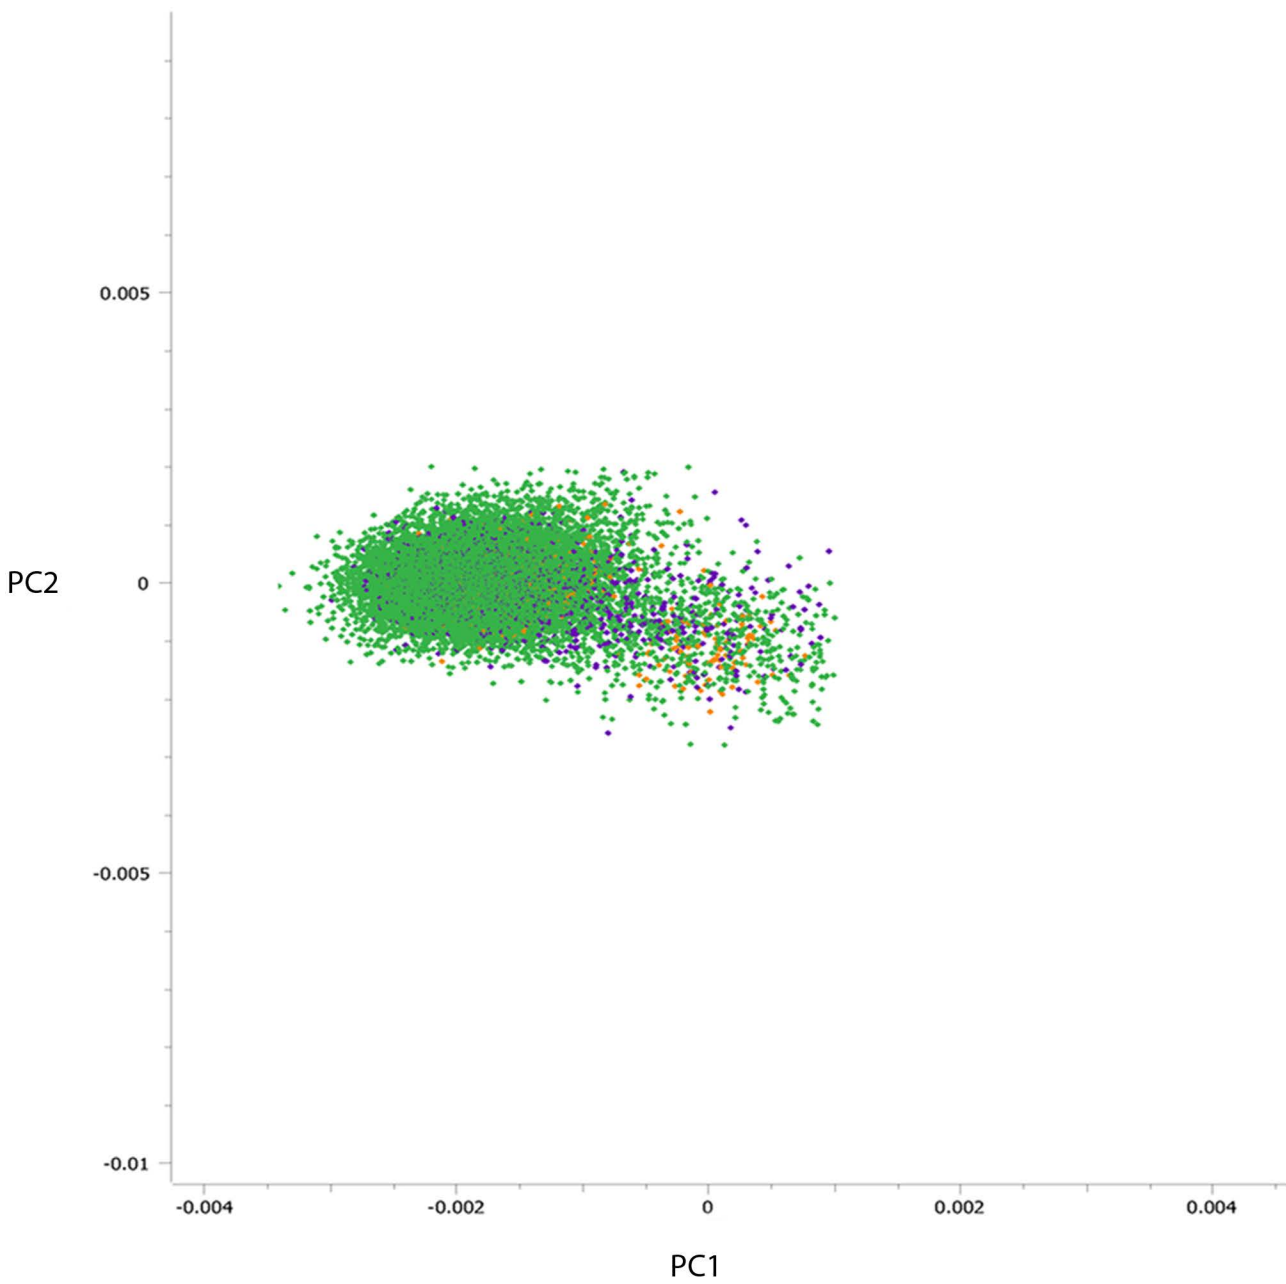

Supplement: iovs-59-08-37_s02.pdf [file iovs-59-08-37_s02.pdf]

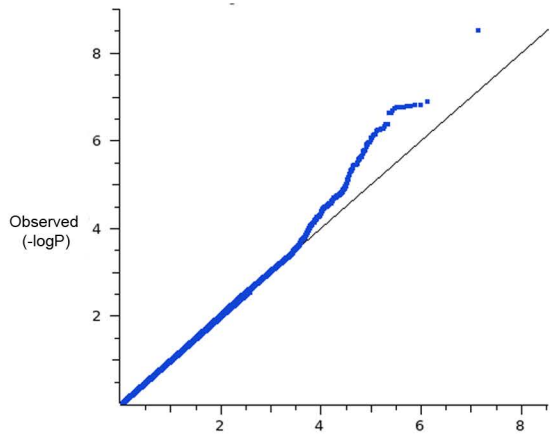

A

Expected  
(-logP)

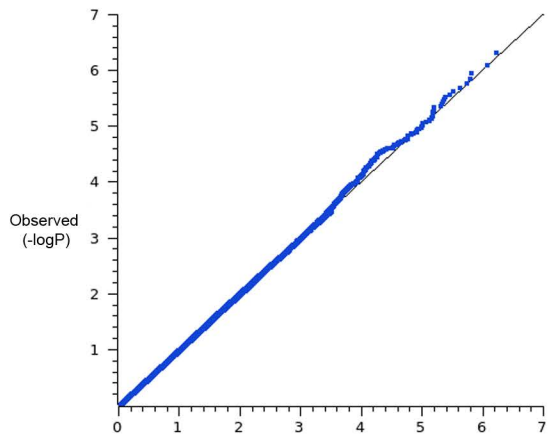

B

Expected  
(-logP)

Supplement: iovs-59-08-37_s03.pdf [file iovs-59-08-37_s03.pdf]

**rs2244352**

Discovery  $P$ -value=2.84E-09  
Meta-analysis  $P$ -value=9.58E-11

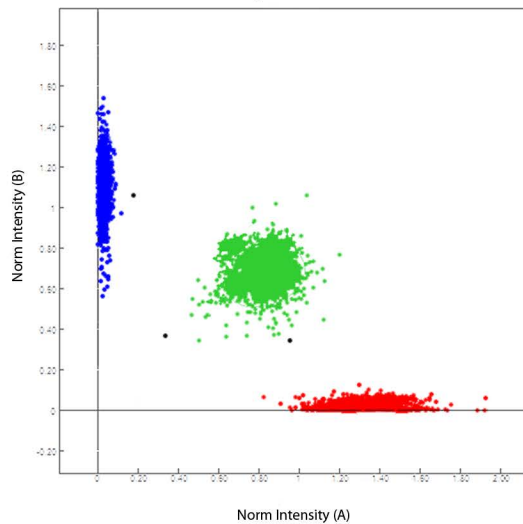

**rs912759**

Discovery  $P$ -value=6.53E-07  
Meta-analysis  $P$ -value=1.89E-08

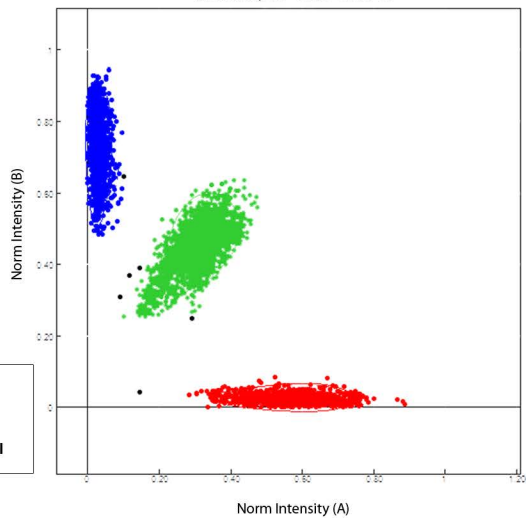

Supplement: iovs-59-08-37_s04.pdf [file iovs-59-08-37_s04.pdf]

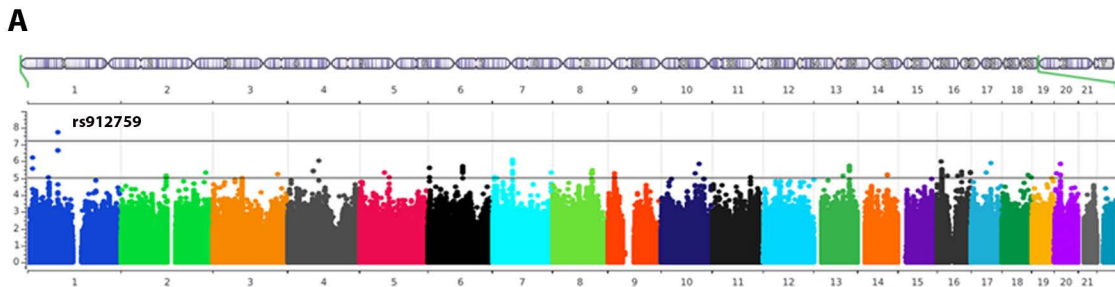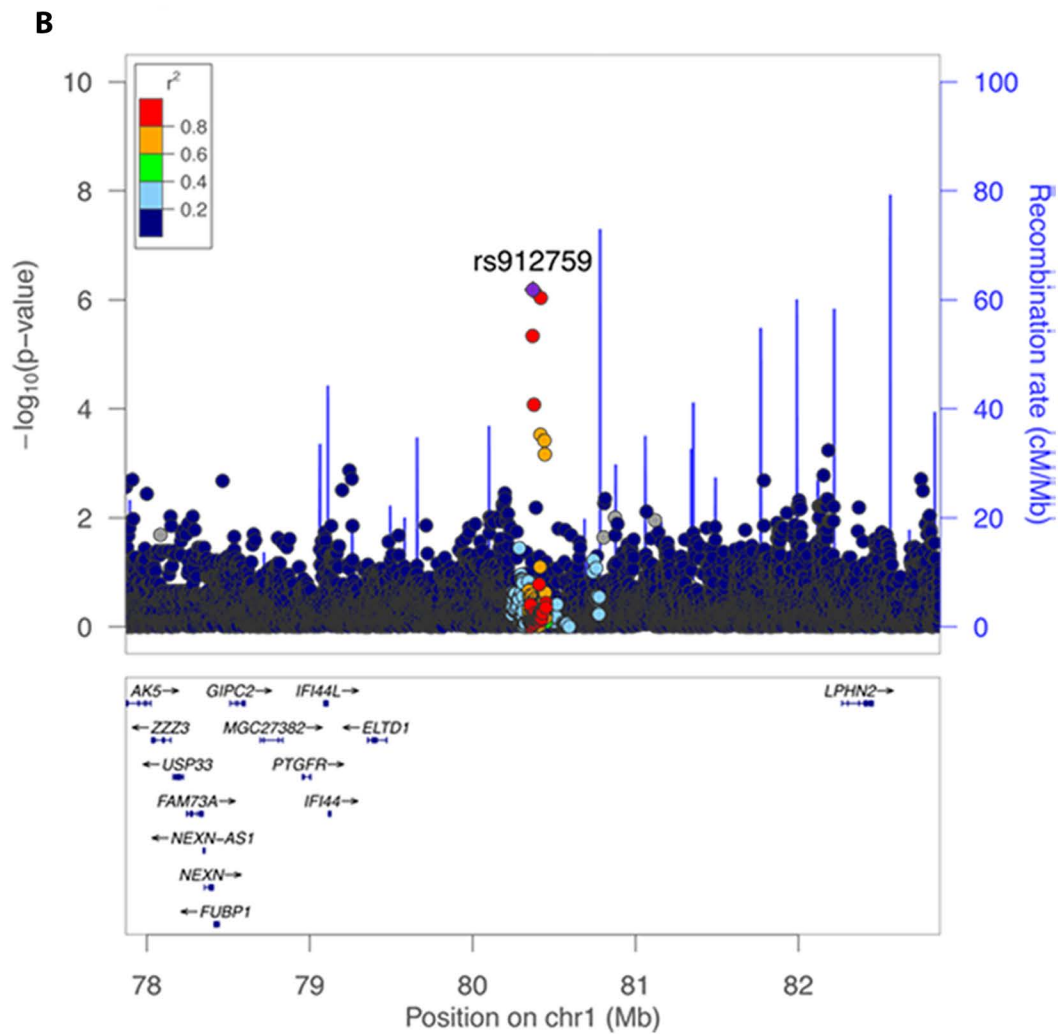

Supplement: iovs-59-08-37_s05.pdf [file iovs-59-08-37_s05.pdf]
